Rob Bierman<sup>1</sup>, Jui M. Dave<sup>3</sup>, Daniel M. Greif<sup>3</sup>, Julia Salzman<sup>1,2,\*</sup>

<sup>1</sup> Department of Biochemistry Stanford University

<sup>2</sup> Department of Biomedical Data Science Stanford University

<sup>3</sup> Departments of Medicine (Cardiology) and Genetics Yale University

\* Primary contact: [julia.salzman@stanford.edu](mailto:julia.salzman@stanford.edu)

## Title

Statistical analysis supports pervasive RNA subcellular localization and alternative 3' UTR regulation

## Abstract

Targeted low-throughput studies have previously identified subcellular RNA localization as necessary for cellular functions including polarization, and translocation. Further, these studies link localization to RNA isoform expression, especially 3' Untranslated Region (UTR) regulation. The recent introduction of genome-wide spatial transcriptomics techniques enable the potential to test if subcellular localization is regulated in situ pervasively. In order to do this, robust statistical measures of subcellular localization and alternative poly-adenylation (APA) at single cell resolution are needed. Developing a new statistical framework called SPRAWL, we detect extensive cell-type specific subcellular RNA localization regulation in the mouse brain and to a lesser extent mouse liver. We integrated SPRAWL with a new approach to measure cell-type specific regulation of alternative 3' UTR processing and detected examples of significant correlations between 3' UTR length and subcellular localization. Included examples, *Timp3*, *Slc32a1*, *Cxcl14*, and *Nxph1* have subcellular localization in the brain highly correlated with regulated 3' UTR processing that includes use of unannotated, but highly conserved, 3' ends. Together, SPRAWL provides a statistical framework to integrate multi-omic single-cell resolved measurements of gene-isoform pairs to prioritize an otherwise impossibly large list of candidate functional 3' UTRs for functional prediction and study. SPRAWL predicts 3' UTR regulation of subcellular localization may be more pervasive than currently known.

## Introduction

As a general rule, it is accepted that the cellular localization of a protein is biologically critical for its function (Hung and Link, 2011). However, the general importance of RNA localization within a cell, and how this localization varies in different biological situations remains poorly understood. Targeted studies have identified examples of genes whose RNA localization is critical to function, such as the enrichment of beta-actin (*Actb*) RNA to lamellipodia in motile chicken embryonic myoblasts (Lawrence and Singer, 1986). It was observed that approximately 80% of total actin mRNA localized to the lamellipodia, and specific disruption of localization, but not expression, of the mRNA resulted in decreased cell motility (Kislauskis *et al.*, 1994, 1997). The same authors also identified so-called “zipcode” sequences in the 3' Untranslated Region

(UTR) of *Actb* which were necessary for proper RNA localization (Kislauskis *et al.*, 1994). In a larger scale study it has been estimated that 70% of mRNAs are spatially localized in *Drosophila* embryogenesis (Lécuyer *et al.*, 2007). Other well-known and recently identified examples of RNA subcellular localization with functional consequences include lipid droplets (Saka and Valdivia, 2012) and TIS11B protein granules (Ma and Mayr, 2018). In these case studies, RNA localization is cis-regulated by either alternative splicing or 3' UTR usage.

While the vast majority of 3' UTR isoform functions remain unknown and incompletely annotated, emerging evidence points to an abundance of cell-type specific regulation (Meyer *et al.*, 2022) where inclusion of different 3' UTRs may even have opposite functions. Cd47, for example, expresses a long-isoform 3' UTR that results in a peripherally localized protein product protecting against phagocytosis, but can also express a short-isoform 3' UTR that results in a cytoplasmic protein product with the same amino-acid sequence that does not confer the same phagocytotic protection (Berkovits and Mayr, 2015). Control of RNA subcellular localization through RNA isoform choice may help pinpoint functions for alternative RNA isoforms and UTRs in eukaryotes.

Spatial transcriptomics has seen rapidly increasing interest as methods become increasingly powerful and affordable (Marx, 2021). However work remains primarily focused on gene expression. Techniques such as MERFISH (Moffitt *et al.*, 2016), and its commercialization Vizgen, as well as SeqFISH+ (Eng *et al.*, 2019) utilize sequential multiplexed fluorescence imaging to localize hundreds to thousands of distinct genes across a tissue with subcellular resolution. Along with RNA-capture based spatial transcriptomics techniques (Ståhl *et al.*, 2016; Stickels *et al.*, 2021; Su *et al.*, 2021), these spatial datasets have primarily been used to analyze the distribution of cell-types within a tissue via gene expression. At a finer scale, RNA distribution within cells has been understudied despite an established history of biologically important case studies discussed in multiple reviews (Lipshitz and Smibert, 2000; Holt and Bullock, 2009; Suter, 2018).

The limited approaches that have been used to detect subcellular localization patterns from high throughput, high resolution spatial datasets rely on co-stains and/or heuristics without statistical formalism (Samacoits *et al.*, 2018; Xue *et al.*, 2020; Tang *et al.*, 2021). As an example, an analysis of a SeqFISH+ dataset relied on arbitrarily chosen hard thresholds to determine peripherally and centrally localizing genes in different mouse cortex cell-types. The use of thresholding can result in overlooked weaker spatial patterns and also makes it difficult to control the false discovery rate (FDR) (Eng *et al.*, 2019). Additionally, compartment-based analysis of MERFISH datasets has been used to detect differences in neuron soma, axon, and dendrite transcriptomes using the Wilcoxon rank-sum test and Moran's I (Moran, 1950; Xia *et al.*, 2019). Discretizing cellular regions does not fully utilize the information present in the MERFISH dataset since RNA subcellular localization is intrinsically a continuous process. Similarly, while proximity-tagging and sequencing approaches such as APEX-seq (Fazal *et al.*, 2019; Padrón and Ingolia, 2022) have generated high-plex datasets for RNA localization within subcellular compartments, these methods require genetically modified cell-lines, and cannot be readily applied to tissue. Finally, to our knowledge no study has attempted to test whether isoform regulation can explain subcellular localization at the gene level in massively multiplexed FISH datasets.

To address the limitations of prior approaches, we introduce Subcellular Patterning Ranked Analysis With Labels (SPRAWL) as a transparent and statistical approach to detect RNA subcellular patterning from multiplexed imaging datasets. SPRAWL assigns an interpretable score to detect RNA localization patterning for a gene of interest in an individual cell. Further, these scores can be carefully aggregated to detect spatial patterns between cell-types and biological replicates with FDR control. SPRAWL currently identifies continuous peripheral, central, radial, and punctate localization patterns which are significantly more extreme than expected by chance in either direction of effect. SPRAWL can be extended to detect user-defined patterns and represents a general framework for unbiased discovery of RNA subcellular localization patterns from multiplexed imaging datasets. This integrative approach identifies genes with potential cis-regulatory spatial sequences, and prioritizes candidates for experimental follow-ups.

## Results

SPRAWL was developed to be a non-parametric single-cell resolved measure of RNA subcellular localization that is robust against confounding variables of cell size, and RNA expression level, while providing effect-size and statistical significance measures. SPRAWL reduces complex spatial patterns into one-dimensional scores that are readily interpretable and comparable. An additional benefit of SPRAWL scores is their direct integration with other statistical methods: scores can be analyzed through the lens of various metadata such as cell type, or correlated with other measures such as RNA 3' UTR regulation or splicing state.

SPRAWL is a publicly available Python package that can be installed using pypi with pip install subcellular-sprawl and has also been implemented in Nextflow (Di Tommaso *et al.*, 2017) and Docker for reproducible analyses at large scale in high-performance or cloud computing environments. SPRAWL source code and documentation are available at <https://github.com/salzman-lab/SPRAWL>.

### **SPRAWL quantifies peripheral and central subcellular RNA patterning with rank statistics**

Examples of RNA localized to the plasma membrane include *Actin* and *Tubulin* in mammalian cells (Lawrence and Singer, 1986), *ASH1* in yeast (Bertrand *et al.*, 1998), and *Oskar* in fly oocytes (Rongo *et al.*, 1995). These foundational examples motivate the unbiased statistical detection of RNA localization patterns in reference to the cell-boundary. To satisfy this need, we've created the SPRAWL peripheral metric (Figure 1) which quantifies the extent to which the RNA spots of a gene of interest are more extremely proximal or distal from the cell-membrane than expected by chance.

To calculate the SPRAWL peripheral metric for a given gene in a given cell, first the minimum euclidean distance is calculated between each RNA spot, regardless of gene identity, and the cell-boundary. These distances are then used to rank the spots from 1 to n corresponding to the nearest and furthest RNA spot from the boundary respectively (Figure 1a). The median rank is calculated for the m RNA spots of the gene. Under the null hypothesis that the gene is not peripherally localized, the expected value is  $(n+1)/2$ . Genes with lower median ranks than the expected value are more peripherally localizing, while larger median ranks correspond with anti-peripheral localization.

The probability mass function (PMF) of observing each possible median peripheral rank has a direct formulation which allows for exact calculations of p-values under the null (Figure 1b). The actual SPRAWL peripheral score,  $X$ , is the result of normalizing the median rank to be between -1 (anti-peripheral) and 1 (peripheral) with an expected value of 0 (not peripheral) (Figure 1c). Finally, the per cell-type scores can be calculated as the mean of the SPRAWL cell scores to provide an aggregate measure,  $Y$ , of RNA localization per gene per cell-type. Under the Lyapunov Central Limit Theorem (Billingsley, 1995),  $Y$  will approach in distribution a standard normal as the number of cells increases. The SPRAWL centrality score is conceptually identical to the peripheral score, but RNA spots are ranked by distance from the cell-centroid rather than the cell boundary. All subsequent steps are the same as the peripheral metric.

One of the main advantages of using a rank-based formulation of the periphery and centrality scores is the insensitivity to cell size and rotation. This feature facilitates direct comparisons of SPRAWL scores between cells and even samples. The simplicity of the statistically-backed metrics provides both effect size and p-value handles for detecting extreme RNA patterning in either the positive (peripheral/central) or negative (anti-peripheral/anti-central) direction of effect. Finally it is worth noting that while the peripheral and central scores are strongly anti-correlated (Supplemental Figure 1d), there are clear examples of RNA with simultaneously central and peripheral localization in a cell when the cell-boundary runs near to the cell centroid.

### **SPRAWL detection of punctate and radial patterning relies on gene-label permutations**

While some RNAs are known to be peripherally or centrally localizing as discussed above, others are known to be trafficked to organelles (Chang *et al.*, 2004), cell-poles (Rongo *et al.*, 1995; Hachet and Ephrussi, 2004), or neuronal processes (Minis *et al.*, 2014; Zappulo *et al.*, 2017; Das *et al.*, 2019). In all cases, RNA molecules of the same gene will be more spatially aggregated than expected by chance. To detect such patterning, SPRAWL punctate and radial metrics have been defined to respectively identify RNA species that tend to aggregate by euclidean distance or in one angular sector of the cell.

SPRAWL's punctate score represents the degree to which RNA spots from a given gene are clustered together, scores closer to 1 indicate self-colocalizing or self-aggregating genes. Scores near -1 indicate self-repulsion, and scores of 0 indicate an expected level of aggregation under the null of random patterning.

When calculating the punctate score for a gene of interest with  $m > 1$  RNA spots in a cell, a subset of  $k$  random pairs of spots are selected and the distances between them measured and averaged (Figure 2a). Next gene-label permutations are performed, randomly swapping gene labels but not RNA spot locations, to create a null background of mean between-spot distances by again choosing  $k$  random spots from the gene of interest in each permuted cell (Figure 2b). The punctate score,  $X$ , is normalized to be between -1 and 1 with  $E[X] = 0$  under the null (Figure 2c). Negative values indicate anti-punctate patterning, values near 0 are random or non-punctate, and positive values indicate punctate behavior (Figure 2d). Finally, SPRAWL cell-type scores can be calculated using the Lyapunov Central Limit theorem in the same manner as in the peripheral score (Figure 1d). The radial metric is conceptually

identical to the punctate metric but measures mean between-spot angles instead of between-spot distances.

Unlike the peripheral and central metrics, the radial and punctate scores rely on permutation testing to create a null distribution for each gene in each cell. The advantages of permutation testing are that the metrics can be of any complexity, but the disadvantage is the increased compute time in comparison with the simpler rank-based approaches. The permutation-based metrics retain the critical insensitivity to cell size, shape, and orientation present in the rank-based metrics.

### **SPRAWL robustly detects subcellular localization in massively multiplexed FISH datasets**

The SPRAWL peripheral, central, punctate, and radial metrics described above have been used to analyze spatial datasets comprising a total of 22 experiments over 4 mice processed by three different research groups and two technologies (Eng *et al.*, 2019; Zhang *et al.*, 2021; Vizgen, n.d.). Applying SPRAWL to these datasets revealed: (1) gene/cell-type localization patterns have high correlation between biological replicates; (2) differential subcellular localization patterns of the same gene in different cell-types; and (3) differential subcellular regulation corresponding with cell-type differential 3' UTR length from associated single-cell RNA sequencing (scRNAseq) datasets (Yao *et al.*, 2021) for 26 genes including *Slc32a1*, *Cxcl14*, *Nxph1*, and *Timp3*.

### **SPRAWL detects cell-type specific localization patterns across biological replicates**

We applied SPRAWL to the BICCN motor cortex (MOp) (Zhang *et al.*, 2021), Vizgen Brainmap, and Vizgen Liver datasets (Vizgen, n.d.) which each contained either biological or technical replicates. The median SPRAWL gene/cell-type scores were significantly positively correlated between replicates within all three datasets for all four spatial metrics having significant Pearson correlation with coefficients larger than 0.8, Spearman correlation coefficients larger than 0.72, at an alpha level of 0.05 (Figure 3a: blue).

Given the observed high pervasiveness of subcellular patterning in all datasets, we tested the specificity of SPRAWL by using permuted data. By permuting the gene-label of the RNA spots in a cell, we create negative control datasets that are known not to have significant spatial patterning. Assuringly, SPRAWL median gene/cell-type scores were not significantly correlated between biological replicates in any permuted dataset (Figure 3a: orange). Furthermore, in these negative control datasets, SPRAWL does not call any gene to be significantly localized in any cell-type after correcting for multiple hypothesis testing.

As an additional control for SPRAWL specificity, MERFISH and Vizgen experiments include “blank-codes” which do not correspond to actual genes and are therefore not expected to have significant spatial patterning. In the BICCN MOp dataset 10 blank-codes were included which SPRAWL determined to be spatially regulated in only the radial and punctate metrics. For the punctate metric, 191 of the 248 unique genes that had statistically significant patterning in at least one cell-type had smaller BH-corrected p-values than the most significant blank-codes. Similarly for the radial metric, 232 of the 241 unique significant genes had a smaller p-value than the most significant blank-codes. SPRAWL did not identify significant patterning of blank-codes in any cell-type pairings across all replicates for the Vizgen Brainmap and Vizgen Liver datasets. Therefore, adjusting the p-value thresholds to filter out blank-codes would result

in the loss of only 57 punctate and 9 radial gene significance calls from only one dataset, again supporting SPRAWL's specificity.

To test whether the SPRAWL peripheral score was sensitive to cell-segmentation, we compared SPRAWL before and after mutating the cell boundaries of a dataset (Methods and Supplemental Figure 1e). Specifically, the cell boundary locations were computationally shrunk by a factor of 1.25 fold in the x and y direction, discarding spots that fell outside the new boundaries. In both the BICCN MOp and Vizgen Brainmap datasets, a Pearson correlation coefficient of greater than 0.85 was observed between the shrunk and original median gene/cell-type periphery scores. Insensitivity to cell-segmentation is an important feature of a subcellular localization algorithm due to the multitude of approaches and noted difficulties in computational cell segmentation (Coelho *et al.*, 2009; Thomas and John, 2017; Vicar *et al.*, 2019; Durkee *et al.*, 2021).

While SPRAWL's specificity can be benchmarked with multiple approaches, estimating SPRAWL's sensitivity on real datasets is confounded by a lack of known true positive subcellular RNA patterning by cell-type. As a proxy for ground-truth, we hypothesized that RNAs encoding proteins with a signal recognition particle (SRP+) would have more centralized patterning than RNAs without (SRP-) due to their known trafficking to the endoplasmic reticulum. Surprisingly, the scores of all SPRAWL metrics were indistinguishably distributed between SRP+ and SRP- genes (Supplemental Figure 5a). In an additional approach, we tested whether highly central RNAs were enriched in single-nucleus sequencing (snRNAseq), compared to scRNAseq, which was true for only a subset of genes (Supplemental Figure 5b). A potential reason for both ground-truth proxies behaving unexpectedly is the nucleus is not necessarily centrally localized and RNAs may not be detectable when protein-bound.

### **Cell-type specific subcellular localization is regulated in BICCN MOp replicates**

In the MOp dataset, SPRAWL detects hundreds of significantly patterned gene/cell-type groups. The MOp dataset imaged 252 genes through multiplexed barcoding, including 10 negative-control barcodes, and profiled nearly 300,000 cells from the mouse motor cortex (Zhang *et al.*, 2021). Biological replicates were present from two mice (Figure 3a: top row) with 6 slices taken from each animal. Conservative filtering of cells and cell-types (see Methods: SPRAWL Filtering) resulted in 220 unique genes and 19 distinct cell-types, with 1,999 of 4,180 (47.8 %) possible gene/cell-type combinations observed. After BH multiple hypothesis testing correction over both biological replicates, 1511 (75.6%) gene/cell-type pairs were called significant by the SPRAWL peripheral metric, 1492 (74.6%) by the central metric, 1475 (73.8%) by the radial metric, and 1448 (72.4%) by the punctate metric. Spatial patterning was extensive and consistent between replicates with more than 77.8% of the gene/cell-type pairs having the same direction of effect, positive or negative, between the two replicates. Additionally, 176 of 220 (80%) unique genes were found to be significantly spatially regulated in at least one cell-type in all metrics, but not necessarily the same cell-type in all metrics. Similarly all 19 cell-types were observed to be significant with at least one gene in each metric (Supplemental Table 1).

### **Cell-type specific subcellular localization is regulated in Vizgen Brain replicates**

The Vizgen Brainmap dataset contains nine MERFISH experiments from three coronal sections of a mouse brain. Each section contains three adjacent cryotome slices from the same animal that are considered pseudo-biological replicates (Figure 3a: middle row). Approximately 70,000 cells and 649 genes, of which 165 were blank-code negative controls, were imaged. Cell-type annotations were not provided for this dataset, and instead a simple clustering of cells by gene count from the spatial data was performed using scanpy (Wolf *et al.*, 2018) that resulted in 42 cell-type proxies (Methods, Brainmap clustering). Analysis of the three brain slices resulted in 158 (54.7%), and 159 (55.0%), 139 (48.1%), and 156 (54.0%) unique genes significant in at least one cell-type for the peripheral, central, radial, and punctate analysis respectively. For the peripheral metric, 2,535 of 2,877 (88.1%) gene/cell-type groups present in all three tissue slices had significant Benjamini-Hochberg corrected p-values ( $\alpha = 0.05$ ). A similar 87.7% of gene/cell-types were significant according to the centrality metric. For the radial metric, 1,194 of 2,877 (51.6%) gene/cell-type groups were significant, while the punctate metric identified 2,196 of 2,877 (76.3%) of the gene/cell-type pairs as significant.

All slices from all sections were pairwise significantly correlated for the peripheral, radial, and punctate metrics with a minimum Pearson correlation coefficient of 0.55. Cell-type SPRAWL correlation results were insensitive to different cell-type clustering parameters (Supplemental Figure 2), suggesting that the agreement between biological replicates found by SPRAWL is robust to different granularities of clustering; a desirable trait since cell-type clustering approaches vary widely.

### **Cell-type specific subcellular localization is regulated in Vizgen Liver replicates**

The Vizgen Liver dataset consists of two mice, each with two replicates for a total of four MERFISH experiments (Figure 3a: bottom row). Spatial data was collected on more than 1 million liver cells across all four datasets and 589 distinct genes were imaged, of which 127 were blank-codes. As with the Vizgen Brainmap dataset, no cell-type annotations were provided and naive clustering was performed to generate pseudo-annotations. After filtering out gene/cell-type groups with fewer than 20 cells, SPRAWL detected 112 (29.1%) peripheral, 112 (29.1%) central, 118 (30.6%) radial, and 134 (34.8%) punctate genes significant in at least one cell-type. Median SPRAWL scores per gene/cell-type were highly correlated between the biological replicates with Pearson correlation coefficients of 0.80, 0.74, 0.62, 0.77 for the peripheral, central, radial, and punctate metrics respectively. The peripheral metric identified 1,399 of 1,642 (85.2%) significant gene/cell-type pairs after restricting to median RNA spot count  $\geq 5$ , and presence in both biological replicates. Similar percentages of 85.1%, 51.4%, and 77.4% of gene/cell-type pairs were found to be significantly patterned in the central, radial, and punctate metrics.

### **Significant SPRAWL punctate and radial scores are highly skewed towards aggregation**

Over 99% of the significant gene/cell-type groups have positive ( $X > 0$ ) radial and punctate scores, revealing a significant and general tendency of RNAs to colocalize with other RNAs of the same gene both by euclidean distance (punctate metric), and angular dispersion (radial metric). In comparison, the SPRAWL peripheral metric in the BICCN MOp dataset identifies 828 significant gene/cell-type pairs, of which 56.1% are more positively peripheral ( $X > 0$ ) and the remaining 43.9% are anti-peripheral ( $X < 0$ ). Similarly, the SPRAWL central metric

identifies 45.2% of significantly positive scoring gene/cell-type pairs. Empirical CDF plots of SPRAWL metric scores provide an alternate view for the same phenomenon (Supplemental Figure 1a,1b). Additionally, null simulated datasets did not have a bias towards positive radial or punctate scoring (Figure 3a orange).

SPRAWL detects 112 of 252 genes (44.4%) as globally positively punctate and radial in all cell-types which express them including extreme genes, such as Claudin 5 (*Cldn5*) which has a median SPRAWL punctate and radial score of 0.85 and 0.84 respectively (Figure 3b purple ticks) as well as VEGFR-1 (*Flt1*) which has a median SPRAWL punctate and radial score of 0.83 for both metrics (Figure 3c). *Cldn5* protein product is the primary integral membrane protein component of tight junctions in mouse brain and knockouts result in postnatal death (Nitta *et al.*, 2003). *Flt1* is a transmembrane tyrosine kinase receptor that binds vascular endothelial growth factor (VEGFR) and also has a shortened alternative soluble protein isoform (Shibuya *et al.*, 1990) (Jin *et al.*, 2012). The consistent positive punctate and radial scores of Flt1, and lack of differential localization patterns, could indicate that either only one isoform of Flt1 is expressed across all cell-types, or that the two mRNA isoforms are alternatively expressed but do not have differential subcellular localization patterns. It is currently not known in the literature whether *Cldn5* or *Flt1* RNA localization is regulated, but a followup targeted FISH experiment could be insightful. We note that imaging errors resulting in calling a single RNA molecule as two nearby molecules could be artificially inflating the radial and punctate scores leading to more significant calls.

### **SPRAWL detects genes with opposite and cell-type dependent RNA localization**

We defined opposite-directionality genes as those that have the pattern of being significantly positively scoring in one cell-type, while being significantly negatively scoring in another cell-type for the same metric, such as peripheral vs. anti-peripheral. Significant spatial patterning of a gene in only a subset of cell-types suggests differences in either cis or trans-acting regulatory factors. For the BICCN dataset out of 252 genes, 92 (36%) peripheral, 96 (38%) central, 2 (1%) radial, and 10 (4%) punctate genes are opposite-directionality (Supplemental Table 1). We define an additional class of genes as cell-type dependent, but not opposite-directionality patterning. These genes are significant in at least one cell-type, but insignificantly localized in at least one other cell-type and account for approximately 55% of genes in peripheral and central metrics, and 20% for the radial and punctate metrics across all datasets. SPRAWL's ability to detect cell-type specific regulation of subcellular patterning generates testable hypotheses for follow-up analysis and experimentation. A computationally tractable hypothesis of interest inspired by the known presence of "zip code" elements, is whether there exist general correlations between 3' UTR isoform and localization across cell-types.

### **Subcellular RNA localization is enriched for correlations with 3' UTR length**

Alternative 3' UTRs and splice isoforms are known to result in differential mRNA localization (Kislauskis *et al.*, 1994). Inclusion or exclusion of specific sequence elements can disrupt RNA binding proteins (RBPs) from binding and localizing the transcript. RBPs that have been identified as controlling transcript localization can have cell-type specific expression, including at the isoform level (Yisraeli, 2005; Müller-McNicoll and Neugebauer, 2013; Hentze *et*



*al.*, 2018). Examples of such RBPs include members of the RNA-transport granule (Kanai *et al.*, 2004), providing a model for why RNAs may be cell type specifically localized as a function of their isoform. Conversely, differential localization of the same isoform can occur if the trans-acting localization factor is differentially expressed in different cell-types.

We coupled a recent statistical method to measure 3' UTR length called the ReadZS (Meyer *et al.*, 2021) with SPRAWL to identify genes with spatial localization correlated with 3' UTR regulation (Booeshaghi *et al.*, 2021). We used ReadZS to statistically quantify 3' UTR lengths at single-cell resolution, and then computed the median ReadZS score by cell-type and gene on cell-type-matched 10Xv3 scRNAseq datasets from the BICCN consortium (BRAIN Initiative Cell Census Network (BICCN), 2021). Spatial localization SPRAWL scores and ReadZS 3' UTR lengths were correlated by gene/cell-type (Figure 4a). Twenty-six genes were detected as having significant SPRAWL/ReadZS correlation after BH multiple hypothesis correction at an FDR level of 0.05, a 2-fold enrichment compared to what is expected by chance (see Methods: Correlation analysis between SPRAWL and ReadZS). No significant gene/metric pairs were detected from the CZB mouse kidney/liver dataset which was the only other dataset with matched scRNAseq. The lack of significant correlations between SPRAWL metric score and 3' UTR length in this dataset could be due to multiple factors, including this dataset having fewer coarser cell-type definitions.

### ***Slc32a1*, *Cxcl14*, and *Nxph1* 3' UTR length predicts sub-cellular localization**

SPRAWL detects 36 unique genes and 84 pairs of gene/metric combinations (i.e. gene1/peripheral, gene1/radial) with significant correlations to that gene's 3' UTR length. From this list *Slc32a1*, *Cxcl14*, and *Nxph1* were selected as representatives of the central, radial, and punctate metrics respectively. All have significant evidence for cell-type differential expression of un-annotated 3' UTRs and an unusually high degree of 3' UTR conservation. Figure 4 depicts the SPRAWL scores and predicted 3' UTR lengths for *Slc32a1*, *Cxcl14*, and *Nxph1* in multiple cell-types. Representative low and high scoring cells for each gene/cell-type pair were chosen randomly after filtering for SPRAWL scores less than -0.2 and greater than 0.2 respectively, having 5 or more RNA spots of the gene of interest.

*Slc32a1*, synonymously *VIAAT* or *VGAT*, is a marker of GABAergic neurons and was found to be differentially central by cell-type (Figure 4b). *Slc32a1* is an integral membrane protein residing in synaptic vesicles where it uptakes glycine and gamma-aminobutyric acid (GABA) (Gasnier, 2004). *Slc32a1* is currently annotated to have 2 exons in the UCSC genome browser mm39 (Lee *et al.*, 2022), but was at one point thought to have 3 exons and exhibit alternative splicing near the 3' UTR without known biological significance (Ebihara *et al.*, 2003). SPRAWL central score and ReadZS have significant correlation (Pearson  $R=-0.94$ , corrected  $p \ll 0.05$ ). Differential central localization of *Slc32a1* RNA between cell-types is of potential interest due to the protein product's known role of localizing to synaptic vesicles in neurons which would yield the highly non-central distribution observed in the L6 CT and L5 IT neuronal cell-types.

*Cxcl14* 3' UTR length and SPRAWL radial score were significantly correlated (Pearson  $R=0.9$  corrected  $p \ll 0.05$ ); cell-types with longer 3' UTRs have increasingly extreme radial clustering, while the unannotated shorter 3' UTRs have middling SPRAWL non-radial scores near zero. Only one *Cxcl14* 3' UTR isoform is annotated, but ReadZS analysis predicts a

decrease in length of about 600 bps (Figure 4c) (Bässler *et al.*, 2001). The protein product of *Chemokine (C-X-C motif) ligand 14*, *Cxcl14* or BRAK, is a small chemokine of length 99 residues in mouse and 111 in human, and was originally found to be highly expressed in breast and kidney (Hromas *et al.*, 1999). *Cxcl14* is constitutively expressed in skin and keratinocytes and is a potent leukocyte recruitment factor (Westrich *et al.*, 2020) but has also more recently been observed as constitutively expressed throughout multiple brain regions where one of its functions is to regulate synaptic transmission (Banisadr *et al.*, 2011). According to the MERFISH dataset, *Cxcl14* was lowly but consistently expressed with the full-length 3' annotated UTR in 429 L6 neurons with a median of 5 spots per cell while having higher expression in Vip-cells and astrocytes where a slightly shorter 3' UTR was expressed. We hypothesize that *Cxcl14* has differential 3' UTR usage associated with differential expression across these cell-types and that the novel short 3' UTR is less radially clustered than the annotated full-length 3' UTR.

*Nxph1*, neurexophilin-1, is a ligand of  $\alpha$ -neurexin ( $\alpha$ -*Nrxn*) and is expressed in inhibitory neurons (Born *et al.*, 2014). The radial SPRAWL score of *Nxph1* is positively correlated with 3' UTR length (Pearson R=0.9, corrected p << 0.05 Figure 4d). *Nxph1* is a secreted protein that binds to multiple splice isoforms of  $\alpha$ -*Nrxn* at synapses with varying specificity (Wilson *et al.*, 2019). To our knowledge, neither differential 3' UTR lengths nor differential subcellular localization patterns have been previously described for *Nxph1*, although dendritic targeting by 3' UTRs of other proteins, such as CaMKII, has been identified (Mayford *et al.*, 1996).

All three genes, *Slc32a1*, *Cxcl14*, and *Nxph1*, have predicted miRNA binding sites tiling their 3' UTRs suggesting possible mechanisms of differential 3' UTR post-transcriptional selection and regulation (Supplemental Figure 4a). We show an additional three genes with correlated spatial and 3' UTR length show similar patterns (Supplemental Figure 4b).

### ***Timp3* 3' UTR length predicts peripheral localization**

In the BICCN data, *Timp3* has the largest observed variation in estimated 3' UTR length between cell-types, with the most divergent read-buildup between layer-6 inferior temporal (L6 IT) and somatostatin-expressing (Sst) neurons reflecting at least two dominant 3' UTRs differing in length by > 2 kilobases (Figure 5a). These 3' UTR read densities were consistent across mouse biological sequencing replicates within 10X scRNAseq experiments. Only one UTR is annotated, though a gene antisense to *Timp3*, *Sync3* on the minus strand, overlaps its transcriptional radius. We are confident that observed reads can be confidently attributed to *Timp3* as *Sync3*'s nearest exon is ~5kb from *Timp3*'s UTR and plus-strand mapping reads alone were analyzed.

*Timp3* is a secreted matrix metalloprotease inhibitor that has been implicated in multiple diseases ranging from cardiomyopathies to macular dystrophies (Weber *et al.*, 1994; Schimpf *et al.*, 2012), but subcellular RNA localization patterns have not been reported. Elevated *Timp3* gene expression (Capone *et al.*, 2016) is linked to compromised cerebral blood flow, and the RNA is experimentally validated to be a target of microRNA (miRNA) regulation (Fiorentino *et al.*, 2013). We observe *Timp3* RNA to be significantly peripheral in L6 IT neurons; while being insignificantly peripherally localized in Sst cells. SPRAWL and ReadZS 3' UTR scores had a significant negative correlation of R=-0.68 and p << 0.05 Pearson BH-corrected p-value. *Timp3*'s longer, annotated 3' UTR isoform is expressed in cell-types with significantly less peripheral localization as compared to shorter unannotated isoforms (Figure 5b).

We studied whether *Timp3*'s 3' UTR length was more globally regulated in endothelial and other cell-types through scRNAseq and in different biological contexts in both mouse and human datasets and extended the analysis to include *Timp2*. Mouse and human *Timp3* have a 96.2% amino acid sequence similarity with mouse and human *Timp2* having an even higher 98.2% sequence identity. ReadZS also detected statistically significant *Timp3* 3' UTR length shifts between cell-types from the Tabula Sapiens consortium (Tabula Sapiens Consortium\* *et al.*, 2022) in the lung and other tissues (Supplemental Figure 3a). Further, we found both *Timp2* and *Timp3* UTR length to be regulated in lung tissue slices across endothelial, epithelial, immune, and stroma cell-type compartments (Figure 5c,d). Since SPRAWL identified a highly negative correlation between *Timp3* peripheral subcellular localization and 3' UTR length, and since *Timp3* 3' UTRs become shorter during lung culture, the subcellular localization of *Timp3* is predicted to shift to a more peripheral distribution during the lung culture. In conjunction with 3' UTR length shortening, gene expression of *Timp3* decreases over this time course in all cell-type groups (Supplemental Figure 3b).

Both mouse and human *Timp3* show high conservation within its 3' UTR. Conservation is particularly high near the two dominant alternative 3' UTR regions (Figure 5a,c: Cons 100 Verts track), all but one of which are un-annotated. These regions could contain alternative end processing or regulatory sequences. In the case of mouse *Timp3*, this includes annotated binding sites for miR-181c-5p and miR-221-3p and RBPs Cirbp, Cpsf6, and Celf1 (Figure 5a). The 3' UTR isoforms differentially include these regions, releasing the shorter isoforms from regulatory pressures by more distal elements, including the experimentally validated miR-21 that binds in the 3' UTR of human *Timp3* (Hu *et al.*, 2016). In this study the authors found that high expression of miR-21 led to repression of *Timp3* and pathogenic activation of angiogenesis.

Together, we hypothesize that *Timp3* may have both secreted and non-secreted isoforms, with a precedent set by *Cd47* (Berkovits and Mayr, 2015). Further, we hypothesize that this regulation is controlled by alternative 3' UTR isoform lengths that determine subcellular RNA localization through interaction with RBPs and microRNAs that specifically bind the longer isoform. This example illustrates the power of SPRAWL for unsupervised discovery of subcellular localization and its integration with isoform-resolved, annotation-free analysis of scRNA-seq to generate testable biological hypotheses regarding isoform-specific regulation and function.

### **Human brain pericyte cell culture shows differential temporal *Timp3* 3' UTR usage**

Motivated by the findings that (1) mouse brain cell-types expressing shorter *Timp3* 3' UTR isoforms were correlated with increasingly peripherally localized *Timp3* RNA (Figure 5b), and (2) *Timp3* 3' UTR lengths decrease throughout human lung slice culture (Figure 5c,d), we hypothesized that *Timp3* protein secretion would be sensitive to RNA localization and/or 3' UTR length. We tested this hypothesis using a human brain pericyte cell-line known to express *Timp3* protein. The pericytes were cultured over 5 days with supernatant samples collected at 6, 24, 48, and 72 after plating. At each timepoint, the number of cells, total extracellular protein concentration (BCA), extracellular *Timp3* protein (ELISA), and *Timp3* RNA (qPCR) were measured (Figure 6a).

We observed that the rate of per-cell Timp3 protein secretion, as measured by ELISA, does not significantly change throughout culture time, averaging 350 Timp3 protein molecules per-cell per-hour. The approximately 15 hour half-life of Timp3 protein in cell culture (Mao *et al.*, 2021) was taken into account when making these calculations (Methods Timp3 protein production estimation). However, total extracellular protein per-cell slightly decreased from 6 to 24 hours of cell culture as measured by BCA (Figure 6b). Taken together these findings suggest that Timp3 protein production is not variable during cell culture.

From the previous human lung culture experiment (Figure 5c), we hypothesized that the abundance of shortened 3' UTRs of Timp3 would increase relative to the canonical full-length isoform throughout pericyte cell culture. To test this hypothesis, *Timp3* short and long 3' UTR abundance were estimated using proximal and distal qPCR primers. The proximal qPCR primer pair is designed to amplify both full-length canonical and un-annotated shortened 3' UTR Timp3 templates. The distal qPCR primer pair, however, can only amplify the full-length isoform (Figure 6c). In support of our hypothesis, we observe the ratio of Timp3 distal to proximal RNA abundance significantly decreased from 24 to 48 hours by a factor of 1.5X (Figure 6d).

Additionally, Timp3 3' UTR expression decreased by half between 6 and 24 hours, before doubling between 48 and 72 hours as measured by both proximal and distal qPCR primers (Figure 6e). The large fluctuations in Timp3 expression relative to multiple house-keeping genes is noteworthy since the Timp3 protein production levels remained constant throughout the experiment. This observation may suggest post-transcriptional or post-translational regulation. In conclusion, transcripts of Timp3 with the proximal 3' UTR region increased in relation to the distal region during pericyte culture, which is in agreement with our hypothesis from the human lung culture model.

## Discussion

Highly multiplexed spatial transcriptomics datasets are becoming increasingly available, but analysis tools have overwhelmingly focused on localizing cell-types within tissue, rather than RNA within cells. SPRAWL addresses this need as a novel non-parametric approach for unbiased detection of subcellular RNA localization patterns. In this study, SPRAWL provides evidence for (1) highly consistent RNA patterning across biological replicates, (2) abundant cell-type specific RNA localization, and (3) differential patterning dependent on 3' UTR isoform.

We show that SPRAWL has perfect specificity when benchmarked on simulated negative control datasets, yet identifies thousands of significant genes with extreme RNA localization patterns by cell-type in real datasets. The simplicity of the SPRAWL score facilitates integration with other datasets and tools for follow-up computational studies. We've been able to illustrate this concept by leveraging existing scRNAseq datasets and the ReadZS tool (Meyer *et al.*, 2022) to find genes with correlated patterning and 3' UTR usage. Additionally, SPRAWL results can motivate experimental studies that detect novel biology as we've shown by identifying shifting *Timp3* 3' UTR isoform usage in a pericyte culture experiment.

SPRAWL prioritizes functionally important isoform expression for further study such as *Timp3*, *Slc32a1*, *Cxcl14*, and *Nxph1* which have significant spatial and 3' UTR-usage correlation between cell-types. SPRAWL generates testable hypotheses of cis-regulatory elements that

alter RNA localization which is of high interest because in mice and humans, more than 96% of genes are alternatively spliced and UTR regulation is pervasive but poorly annotated (Olivieri *et al.*, 2021, 2022).

The localization scores generated by SPRAWL are versatile and can be computed for proteins rather than RNA. In fact, trans-regulated spatial events can be detected in future work by applying SPRAWL to subcellular protein localization datasets generated by tools such as CODEX (Black *et al.*, 2021) or MIBI (Keren *et al.*, 2019). Furthermore, the SPRAWL framework can be used to implement different measures of subcellular localization. Some but not all statistically significant patterns detected by SPRAWL are “striking to the human eye,” which has implications for whether human-guided or statistical-guided inferences are preferred and which are more biologically meaningful.

The importance of correlation between SPRAWL subcellular localization and isoform expression, including *Timp3*, *Slc32a1*, *Cxcl14*, and *Nxph1*, was minimally explored in this work. Still we hypothesize a causal link between 3' UTR regulation, localization and potential protein function, as was observed for *Actb*, which could guide future experimental efforts, as well as help pinpoint cell-type specific functions. Our in vitro human pericyte cell culture experiment, for example, showed that pericytes are utilizing a previously unknown shortened *Timp3* 3' UTR in addition to the full-length isoform. Furthermore, a shift towards more shortened 3' UTR usage occurs during pericyte cell culture; a result that mirrors SPRAWL findings in human lung tissue.

Sampling a handful of tissues and cell types, SPRAWL identified tens of RNA species with subcellular localization related to cell type. Many technical limitations suggest that this number is a significant underestimate: for one, MERFISH based approaches require probes to be pre-specified, and thus they (a) aggregate isoforms, confounding cases where two co-expressed isoforms have dramatically different localization patterns; (b) miss isoforms that lack sequence contained in the probe set measurements. Further, single cell sequencing technology and analysis may be under-ascertaining RNA expression due to (i) sampling depth; (ii) poly-A capture bias and (iii) a dearth of computational algorithms to analyze isoform-specific differences. Through the ReadZS we have collapsed UTR variation to a single scalar value (Meyer *et al.*, 2021; Chaung *et al.*, 2022; Olivieri *et al.*, 2022) but we have not explored correlations with RNA splicing or other sequence variants, a topic of further research. Our findings support a model where 3' UTR regulation at the nucleotide level controls localization through function. If this is true, imaging-based technology like MERFISH will have limited power over discovery and in situ sequencing may be a preferred approach. Together, this suggests that isoform-specific localization may be widespread and confer functions that should be tested in future computational and experimental work.

SPRAWL provides an estimate of the pervasiveness of cell-type and 3' UTR regulated RNA localization. Limitations of the study include possible confounding by technical artifacts from probe hybridization, improper cell-segmentation, and bias in the gene panel selected for imaging. Additionally, our decision not to use nuclei boundaries blinds us to situations where an RNA may be highly peripheral, but still within the cell nucleus. This could mean UTR peripherality is confounded with dynamics of export, including transcription at the nuclear periphery. We have attempted to address these potential artifacts through hundreds of thousands of observations and by permutation where possible. Additionally, computationally shrinking cell-boundaries resulted in only minimal changes in SPRAWL scores. Future work on

novel datasets using different segmentation approaches will provide further confidence that SPRAWL detects biologically relevant patterns. We believe the current implementation of SPRAWL is conservative and likely misses patterns due to optical crowding and low-abundance gene expression.

There exists no directly competing method to SPRAWL which is able to leverage highly multiplexed imaging datasets, requiring only RNA spot locations, cell-boundary estimates, and gene identity of each RNA spot. Many current software approaches aim to discretize RNA patterning into subcompartments and rely on co-stains which are not guaranteed to be present in every dataset. Other approaches use statistically opaque machine-learning based classifiers to assign RNA spots to pre-specified patterns (Mah *et al.*, 2022). As spatial transcriptomics methods are commercialized and become more accessible, increasing numbers of public datasets will become available and can be processed by SPRAWL regardless of the tissue or study design.

## Methods

### **SPRAWL input data and preprocessing**

SPRAWL takes as input processed datasets from MERFISH, Vizgen, and SeqFISH+ requiring cell-boundary and RNA spot x,y and gene label information. For MERFISH and Vizgen, this data is the product of applying MERlin (Emanuel *et al.*, 2020) on the raw MERFISH microscopy images to align the images between sequencing rounds, call RNA spots, and perform cell segmentation using a seeded watershed approach described in a prior MERFISH work (Moffitt *et al.*, 2018). SeqFISH+ utilizes a similar approach to identify and decode RNA spots, but then simply defines the cell boundary as the convex hull around all points (Eng *et al.*, 2019).

The MERFISH primary mouse cortex (MOp) dataset has 258 genes from coronal slices of the MOp from two mice as biological replicates (Zhang *et al.*, 2020). Each mouse had 6 MERFISH experiments with 5-6 10 um sections processed together on the same coverslip. Each mouse had 32 total sections. Each 10 um thick section had 7 optical layers spaced 1.5 microns apart. The MERFISH brain MOp processed datasets include multiple z-slices for each cell. The data was downloaded from

[https://download.brainimagelibrary.org/cf/1c/cf1c1a431ef8d021/processed\\_data/](https://download.brainimagelibrary.org/cf/1c/cf1c1a431ef8d021/processed_data/)

The SeqFISH+ dataset imaged 913 cells and 10,000 genes in the mouse cortex at a single z-slice (Eng *et al.*, 2019). The authors assigned each cell to one of twenty-six different cell-type annotations such as Endothelial, Interneuron, Astrocyte, etc. The dataset was downloaded from <https://github.com/CaiGroup/seqFISH-PLUS/blob/master/sourcedata.zip?raw=true>

The Vizgen MERFISH Mouse Brain Map (BrainMap) is a dataset of 649 total genes which include canonical brain cell type markers, GPCRs, and RTKs from a single mouse brain (Vizgen, n.d.). Three full coronal sections were processed along the rostral-caudal axis. Additionally, for each section, three adjacent slices were used as biological replicates with the underlying assumption that adjacent slices in the mouse brain have high similarities in cell-type

composition and spatial organization. Each of the nine imaging datasets contain seven optical layers spaced 1.5 microns apart. Data is publicly available <https://console.cloud.google.com/marketplace/product/gcp-public-data-vizgen/vizgen-mouse-brain-map>

The Vizgen MERFISH Liver showcase contained 2 mouse liver samples each with two MERFISH experiments imaging 347 genes and over one million cells (Vizgen, n.d.). Cell-type annotations were not provided and instead cell-type proxies were determined by clustering the cells based on the MERFISH-determined RNA composition of each cell (Methods: Vizgen Brainmap and Liver showcase clustering to produce cell-type proxies). The dataset contains seven optical layers spaced 1.5 microns apart and data is publicly available from <https://info.vizgen.com/mouse-liver-data?submissionGuid=832a9f61-22d3-44c1-a2cf-838c166d9ac5>

The CZB kidney/liver dataset contained a single mouse kidney and liver sample that were imaged using the Vizgen platform to detect the same panel of 307 genes in ~57,000 cells in the kidney and ~16,000 in the liver (Liu *et al.*, 2022). [https://figshare.com/projects/MERFISH\\_mouse\\_comparison\\_study/134213](https://figshare.com/projects/MERFISH_mouse_comparison_study/134213)

We have specified a simple HDF5 format to standardize the different data sources. In brief, data is stored in a cell-centric manner, consolidating RNA spots and cell boundaries into the same object. This flexible format is described in detail in the github repository <https://github.com/r-bierman/SPRAWL> and includes vignettes with example datasets. For MERFISH and Vizgen datasets, the RNA spots and cell boundaries were assigned locations in a global coordinate, but lacked cell assignments for each RNA spot. We have written simple and fast scripts to make these assignments using the python Rtree and shapely (toblerity.org, 2007) packages. The github repository includes the nextflow pipelines used to transform the downloaded datasets to this HDF5 format.

### **SPRAWL methodology**

SPRAWL preprocesses spatial datasets into a standardized HDF5 file that contains cell boundary, cell-type, and RNA location information generated from MERFISH/Vizgen and SeqFISH+ datasets (Figure 1a). Next per-gene/per-cells are calculated. For the peripheral metric, all RNA spots are ranked based on their minimum distance to the cell boundary (Figure 1b), then their means are used to generate a gene/cell-type score and p-value (Figure 1c). Scores near 1 indicate a gene is highly peripheral in a cell-type, while scores near -1 indicate a pattern of RNA molecules far from the cell-boundary. Intuitively, if a gene is not significant it will not be close or far from the cell boundary and its peripheral score will be near 0, and its p-value will be insignificant. The centrality metric is conceptually similar, where ranking is determined by minimum distance to the cell centroid and positive values indicate unexpectedly centrally-biased distributions. Empirically, the centrality and peripherality metrics are anti-correlated (Supplemental Figure 1b), but not perfectly, as it is possible for an RNA spot to be simultaneously close to the periphery and cell centroid with certain cell shapes such as a

“dumbbell”. Only the ranking step is different between the peripheral and central metrics; all downstream steps are identical.

Under the null hypothesis that a gene is not subcellularly patterned within a cell, the peripheral and central gene/cell scores have an expected value of 0 and a calculable variance that depends on the number of RNA spots. These statistical underpinnings of the gene/cell scores allow for identification of spatially significant patterning within gene/cell-types (Methods). Under the null which is each spot’s gene identity is drawn uniformly from the set of gene/spots observed from the cell, gene/cell scores for  $k$  cells of a single cell-type and gene  $g$  are independent random variables  $X_{g,1}, X_{g,2}, X_{g,3}, \dots, X_{g,k}$  with expected values,  $\mu_i = 0$  and variance  $\sigma_i$ . Independence in this case comes from the assumption that the scores of a given gene across different cells do not influence each other. Note that the scores of different genes within the same cell are not independent due to the ranking procedure. We define  $Y = \text{mean}(X_{g,1}, X_{g,2}, X_{g,3}, \dots, X_{g,k})$  as the SPRAWL gene/cell-type score and a z-score can be calculated under the null that within a cell, each spot’s gene identity is exchangeable with the Lyapunov Central Limit Theorem (Billingsley, 1995) (Methods: SPRAWL gene/cell-type scoring).

The resulting values  $y$  are used to calculate two-sided p-values using the CDF of the standard normal. Multiple hypothesis testing from the numerous gene/cell-type pairs is controlled using the Benjamini-Hochberg correction (Benjamini and Hochberg, 1995).

### SPRAWL peripheral and central metric definition

Each gene-cell pair is assigned a SPRAWL score by (1) ranking all RNA spots, (2) calculating median ranks per gene, and (3) normalizing by the expected median rank. Consider a single cell, with a single z-slice, that has  $n$  total RNA spots, and  $g$  unique genes with each gene having

$m_1, m_2, m_3, \dots, m_g$  spots such that  $\sum_i^g m_i = n$ .

For the peripheral metric, let  $d_1, d_2, d_3, \dots, d_n$  represent the minimum euclidean distance to the periphery of each RNA spot, for the central metric these distances are instead measured from the cell centroid. Each spot is assigned a rank from 1 to  $n$  such that the spot with rank 1 is  $\text{argmin}(d_1, d_2, d_3, \dots, d_n)$  and the spot with rank  $n$  is  $\text{argmax}(d_1, d_2, d_3, \dots, d_n)$  randomly breaking ties where needed.

The ranks are then grouped by gene to calculate the median ranks  $t_1, t_2, t_3, \dots, t_g$ . The peripheral/central SPRAWL gene/cell score  $x_i$  for  $1 \leq i \leq g$ , is the median rank  $t_i$  normalized by the expected median rank  $t_e$  which is  $(n + 1)/2$  for all genes independent of  $m_i$ :

$$x_i = \frac{t_e - t_i}{t_e - 1}$$

Note that  $-1 \leq x_i \leq 1$  since  $\min(t_i) = 1$  yields  $x_i = 1$ , and  $\max(t_i) = n$  yields  $x_i = -1$ .



To generalize the definition of the peripheral/central SPRAWL score in the case that a cell has multiple z-slices with a unique cell-boundary and set of spots for each, the distances  $d_i$  are calculated from each RNA spot to the cell-boundary/centroid in the same z-slice, then the ranks are assigned across all z-slices.

### **SPRAWL radial metric definition**

The radial SPRAWL score is assigned to each gene-cell pair by performing gene-label swapping bootstrapping iterations and measures tendency of genes to be in one sector of a cell or to be radially dispersed.

Consider a single cell, with a single z-slice, that has  $n$  total RNA spots, and  $g$  unique genes with each gene having  $m_1, m_2, m_3, \dots, m_g$  spots such that  $\sum_i^g m_i = n$ . We restrict to  $m_i > 2$  since genes with a single spot do not conceptually have a radial bias.

Before permuting the gene labels, we randomly select a pair of RNA spots for each gene and measure the angle between them with respect to the cell-boundary centroid. Let  $\theta$  represent the minimum angle formed by the three points of the location of RNA spot 1 ( $x_1, y_1$ ), the cell centroid ( $x_c, y_c$ ), and RNA spot 2 ( $x_2, y_2$ ). The cell centroid ( $x_c, y_c$ ) is approximated as the mean of all vertices in the cell boundary polygon. This process is repeated 10 times and averaged to calculate the mean observed angle of each gene.

The same process is repeated after randomly swapping gene labels but keeping the RNA spot locations the same. We perform 1000 bootstrap iterations. These mean permuted angles serve as the null distribution of mean angles which are used in conjunction with the mean observed angle to calculate both mean and variance. In the case that a cell has multiple z-slices, the mean cell centroid over all slices is used to calculate pairwise angles without regard to z-slice.

### **SPRAWL punctate score definition**

The punctate SPRAWL score is conceptually identical to the radial score and also relies on bootstrapping. The punctate score is assigned to each gene-cell pair measuring euclidean distances instead of angles between randomly selected gene pairs. The null distribution is created using the same process as the radial score. In the case that a cell has multiple z-slices, the scoring is performed by projecting all points onto the same (x,y) plane before measuring euclidean distances. This simplification can be readily replaced with true 3D pairwise distances.

### **Theoretical features of the SPRAWL peripheral score**

While the punctate and radial metrics are calculated using bootstrapping and estimated statistics, the SPRAWL peripheral and central metrics have known properties under the null hypothesis that the gene of interest is not spatially regulated in the given cell. Under this null, the ranks of the gene of interest are chosen with equal probability. In an alternate hypothesis such as a gene being peripherally localized in a cell, RNA spots of the gene of interest will have

a skewed probability of being assigned lower ranks, closer to the cell boundary. Under the null hypothesis  $E[X_i] = 0$ , since  $E[T_i] = t_e$  for gene  $1 \leq i \leq g$ .

$Var[X_i]$  depends on the total number of RNA spots in a cell  $n$ , and the number of spots of the gene  $i$ ,  $m_i$ . For example, in the extreme case where  $m_i = n$ , every spot in a cell is the gene of interest and  $Var[X_i] = 0$ .  $Var[X_i]$  for any gene can be calculated under the null by iterating over all possible values of  $x \in X$  since  $X$  is a discrete R.V.

$$Var[X] = \sum_x P(T = t_e + x(1 - t_e) \cup t_e - x(1 - t_e))$$

When there are an odd number of gene spots  $m$ ,  $t$  is the  $(m + 1)/2$  rank order statistic, and under the null hypothesis where the ranks are chosen uniformly, the probability of the  $r$ -th order statistic taking the value  $t$  equals:

$$P(T = t) = \frac{\binom{t-1}{r-1} \binom{n-t}{m-r}}{\binom{n}{m}}$$

Where  $n$  is the total number of RNA spots,  $m$  is the number of RNA spots for the gene of interest, and  $r = (m + 1)/2$ .

$$P(R_0 = r) = \frac{\binom{r-1}{\frac{m+1}{2}-1} \binom{n-r}{m-\frac{m+1}{2}}}{\binom{n}{m}}$$

Calculating  $Var[X]$  when  $m$  is even-values requires significantly more calculation. We still need to calculate

$$P(X^2 = x^2) = P(T = t_e + x(1 - t_e) \cup t_e - x(1 - t_e))$$

But  $t$  is no longer an order statistic and does not have a closed form calculation. Instead  $t$  is the average of the "left of center"  $(\frac{m}{2})$ -th order-statistic  $L$ , and the "right of center"  $(\frac{m}{2} + 1)$ -th order statistic  $R$ . Then for a given  $x$  and corresponding  $t$ :

$$P(T = t) = P\left(\frac{L+R}{2} = t\right)$$

We calculate  $P(T = t)$  by summing the probabilities of observing all possible pairs of  $L$  and  $R$  that sum to  $2t$ . We can think of starting  $L$  and  $R$  as close to  $t$  as possible, and then "walking"  $L$  and  $R$  away from  $t$  one rank at a time in lockstep summing over all  $i$ 's such that  $1 \leq t - 1 \leq n$  where  $n$  is the total number of spots in the cell:

$$P\left(\frac{L+R}{2} = t\right) = \sum_i P(L = t - i \cap R = t + i) = \sum_i P(R = t + 1 | L = t - 1) P(L = t - 1)$$

Omitted for clarity, the ceiling of  $t - 1$  is taken and the floor of  $t + 1$  above to account for non-integer  $t$ .

$P(R = r | L = l)$  has an intuitive interpretation that simplifies to an order statistic probability. Since we observe  $L = l$  we know that the  $R$ -th order statistic must be one of the ranks between  $l + 1$  and  $n$  inclusively. We can renumber these ranks to be between 1 and  $n - l + 1$  and we are interested in the probability that the 1-st order statistic takes the value  $r - l$  in the renumbering. This has the same closed form solution as described in the odd-valued  $m$  case.

Computing  $Var[X]$  for even-valued  $m$  is  $O(n^2)$  since we have to iterate over all possible medians, and then for each median we have to “walk”  $L$  and  $R$  outwards which is itself  $O(n)$ . In comparison, the computation of  $Var[X]$  for odd-valued  $m$  is  $O(n)$ . Through various optimizations, multiprocessing, and caching, SPRAWL calculated  $Var[X]$  in under an hour for all processed samples.

### SPRAWL is not highly sensitive to exact cell boundary segmentation

Sensitivity of SPRAWL to segmentation and cell-boundary locations was tested by computationally shrinking the cell-boundaries. Median peripheral scores per gene/cell-type were significantly correlated between original cell-boundaries and shrunk cell-boundaries with Pearson correlation coefficient of 0.85 on the mouse motor cortex datasets (Supplemental Figure 1e), suggesting empirically that SPRAWL would have low sensitivity to potential cell-segmentation errors.

### SPRAWL gene/cell-type scoring

Consider a cell-type with  $k$  cells with non-zero counts of a gene of interest where each cell is assigned a SPRAWL score  $X_1, X_2, \dots, X_k$ . Note that the  $X_i$  are not i.i.d. due to having different  $Var[X_i]$  resulting from different values of  $m$  and  $n$  as described above.

However, we do make the assumption that the  $X_i$  are independent, which has the biological interpretation that the localization of the gene of interest in one cell does not depend on its localization in another cell. Under this assumption we utilize the Lyapunov Central Limit Theorem (Billingsley, 1995) to estimate that

$$\lim_{k \rightarrow \infty} \frac{1}{\sqrt{\sum_{i=1}^k \sigma_i^2}} \sum_{i=1}^k (X_i - \mu_i) \rightarrow N(0, 1) \text{ in distribution}$$

Under the assumption of bounded variance of the  $X_i$  satisfying Theorem 27.2 and Corollary 27.3 from (Billingsley, 1995):

$$\lim_{k \rightarrow \infty} \frac{1}{\left(\sum_{i=1}^k \sigma_i\right)^{2+\delta}} \sum_{i=1}^k E\left[|X_i - \mu_i|^{2+\delta}\right] = 0$$

We approximate values of  $y$  for each gene/cell-type using the observed  $x_i$  and theoretical mean and variance whose calculation is described above. These  $y$  are used to calculate two-sided p-values from the CDF of the standard normal.

Multiple hypothesis testing over all gene/cell-type pairs is controlled using the Benjamini Hochberg correction (Benjamini and Hochberg, 1995) at a significance level of  $\alpha = 0.05$ .

We calculate the effect size for each gene/cell-type as the mean gene/cell score  $\frac{1}{k} \sum_i^k x_i$

### **SPRAWL is highly specific in identifying genes with subcellular patterning conditional on cell boundaries**

If the gene labels of RNA spots within cells of real datasets are permuted to remove any underlying spatial patterning (Methods), none of the metrics detect significant gene/cell-type patterning after Benjamini Hochberg (BH) multiple hypothesis correction with an FDR of 0.05 for any of the four datasets tested (Benjamini and Hochberg, 1995). All metrics were observed to produce uniform p-values under this null dataset regardless of the number of cells per cell-type, as indicated by theory. The median score per gene/cell-type is dependent on the number of cells, with larger groups having median scores closer to zero (Supplemental Figure 1). The lack of any false positive calls under the permuted null is consistent with at an FDR of 0.05.

### **SPRAWL Filtering**

For all datasets sparse cells and cell-types were filtered out by removing cells with fewer than 10 unique genes and/or fewer than 200 unique RNA spots. Gene/cell-type pairs with fewer than 20 cells were removed from consideration. Further filtering for the radial and punctate metrics requires removal of genes from cells that have only a single RNA spot. These spots are removed and then remaining spots can still be scored in this cell for other genes. All filtering steps are implemented as user-accessible parameters and have made SPRAWL more conservative, increasing the confidence of positive hits, but reducing the power to detect real localization differences that occur for lowly expressed genes and/or rare cell-types.

### **ReadZS usage and modifications**

The ReadZS (Meyer *et al.*, 2021) detects read buildup differences between cell-types from single-cell RNA-seq datasets in an annotation independent manner using equal sized windows tiling the genome. We modified the ReadZS to analyze at the 3' UTR-level of just the ~250 genes imaged in the BICCN MOp dataset. The 10X scRNAseq data was processed individually for the 4 different mouse donors while the SS2 cells across 45 donors were processed as a single sample due to limited cell counts per mouse.

### **Correlation analysis between SPRAWL and ReadZS for MERFISH MOp datasets**

For a given SPRAWL gene and spatial metric, the median ReadZS score of that gene for each cell-type was correlated against the median SPRAWL score over the same cell-types. For positive-strand genes, larger ReadZS score indicates longer 3' UTR isoforms, and vice versa for negative-strand genes. A proxy for 3' UTR length was defined as the distance between the annotated start of the 3' UTR and the RNA mapping position. The span in estimated 3' UTR lengths was measured as the difference between the longest and shortest median cell-type 3' UTR proxy lengths.

### **Vizgen Brainmap and Liver showcase clustering to produce cell-type proxies**

Neither the Vizgen MERFISH Mouse Brain Map nor Liver showcase datasets provided cell-type annotations. We decided to roughly cluster the cells into groups to serve as a proxy for cell-type. The Leiden clustering method was used to find well-connected clusters in all of the filtered 90% highest spot-count cells using Scanpy python package (Wolf *et al.*, 2018). First each dataset was normalized so that each cell had 10,000 spots, then the top 40 principal components were used to build the neighborhood graph with 10 neighbors and perform the Leiden clustering. This resulted in 22 clusters for the Brainmap dataset and 100 clusters for the Liver dataset. The fraction of cells in each cluster was consistent across biological replicates for the Vizgen Liver (Supplemental Figure 2) and Vizgen Brainmap (data not shown) indicating that cells were primarily clustering by type, and not by batch. To estimate the batch effect, we calculated the probability that two cells originated from the same biological replicate given that they were in the same cluster and compared this to the overall probability that two cells are from the same biological replicate. All clusters were within 0.05 of the overall probability of two cells sharing a batch.

### **Simulations to benchmark SPRAWL sensitivity and specificity**

Null simulated datasets were created from the MERFISH BICCN spatial dataset by randomly permuting the RNA-spot gene labels within each cell across the entire dataset. The cell-boundaries, RNA-spot counts, and RNA (x,y,z) coordinates were preserved in the null dataset.

### **Identification of RBP and miRNA binding to *Timp3* 3' UTR**

The RNAInter v4.0 RNA interactome repository was used to search for RBPs and miRNAs with experimental evidence of binding in the 3' UTR of the *Mus musculus* *Timp3*, *Slc32a1*, *Cxcl14*, and *Nxph1* genes (Kang *et al.*, 2022). Target regions for RBPs were taken from RNAInter, while miRNA binding sites were generated and cross-checked against TargetScan release 8.0 (McGeary *et al.*, 2019) and miRWalk (Sticht *et al.*, 2018). Only miRNAs shared by RNAInter, TargetScan, and miRWalk results with experimental evidence were considered.

### **RNAs with signal peptides do not have significantly central or peripheral localization**

We hypothesized that RNAs encoding a signal recognition peptide (SRP) for translation on the rough endoplasmic reticulum would be nuclear localized and would therefore be more centrally localized than genes without signal peptides. We predicted the presence of SRPs using DeepSig (Savojardo *et al.*, 2018) with protein sequences downloaded from Gencode release M28 protein coding transcripts fasta for all genes present across the MOp, Vizgen Brainmap,

and SeqFISH+ cortex datasets. For genes with multiple protein isoforms, the longest isoform was selected for SRP prediction. In all datasets the per-gene per-cell peripheral and central scores were not significantly different according to a Kolmogorov Smirnov test (Supplemental Figure 5a).

### **Genes enriched in single-nucleus RNAseq are marginally correlated with periphery score**

We tested whether nuclear-localizing genes would be assigned higher SPRAWL central periphery scores utilizing both the 10X single-cell RNAseq (scRNAseq) as well as 10X single-nucleus RNAseq (snRNAseq) from the BICCN consortium (BRAIN Initiative Cell Census Network (BICCN) 2021). The single-cell sequencing data was first normalized to the number of counts per gene per cell per one million (TPM) reads for both the cell and nuclear datasets. The median gene/cell-type TPM for both sequencing datasets was determined, and the nuclear-fraction score was determined to be  $\text{snRNAseq-TPM} / (\text{snRNAseq-TPM} + \text{scRNAseq-TPM})$ . The median periphery score per gene/cell-type was correlated against the median snRNAseq-TPM, scRNAseq-TPM, and nuclear-fraction. In all comparisons, the correlation coefficients were small in magnitude, but were significantly positive for the snRNAseq, indicating a link between X tendency and peripherality, and significantly negative in the nuclear-fraction analyses, indicating a link between the gene's enrichment in nuclear reads and its distance from the cell periphery. The small effect size was detectable due to the approximately 8,000 gene/cell-type data points and provides weak support for the hypothesis. We investigated which genes, if any, are differentially nuclear-enriched across cell-types by sequencing and concordantly by peripheral score and discovered *Wipf3* (Supplemental Figure 5b) and *Slc30a3*, which were highly negatively correlated with mean Pearson correlation coefficients of -0.86 and -0.93 across MERFISH MOp samples. Surprisingly, *Satb2* was also discovered to be significant, but had a highly positive mean Pearson correlation coefficient of 0.95. All genes were determined to be significant after Benjamini Hochberg multiple hypothesis correction.

### **Pericyte culture experimental setup with ELISA, qPCR, and BCA readouts**

Human brain vascular pericytes (PCs, Sciencell) were cultured up to passage 5 in low-glucose DMEM (Gibco) supplemented with 10% FBS.  $\sim 1.2 \times 10^5$  PCs were seeded in each well of a 6-well plate pre-coated with 0.1% gelatin. PC lysates and conditioned media were collected 6 hours after seeding for RNA isolation and ELISA applications. Similar samples were collected on 24, 48, 72 and 120 hours after seeding. The 120 hour time point was not considered for analysis since the cells had lifted off from the culture dish. RNA was isolated with the PureLink RNA Kit (Invitrogen) and reverse transcribed with the iScript cDNA Synthesis Kit (Bio-Rad) and qRT-PCR was performed on a CFX96 Real-Time System (Bio-Rad) using SsoAdvanced Universal supermix (Bio-Rad). Transcript levels of TIMP3 with short or long 3' UTR relative to housekeeping gene (B-actin or GAPDH or 18S rRNA) were determined for each timepoint with four biological replicates and three technical replicates.

ELISA measurements were made using the Human TIMP-3 ELISA Kit from Invitrogen (Catalog # EH458RB) and precisely following the manufacturer's instructions.

>Proximal\_primer\_1\_fwd  
GGGA ACTATCCTCCTGGCCC  
>Proximal\_primer\_1\_rev  
TTCTGGCATGGCACCAGAAAT

>Proximal\_primer\_2\_fwd  
AGGTCTATGCTGTCATATGGGGT  
>Proximal\_primer\_2\_rev  
TGGGGCCAGGAGGATAGTTC

>Distal\_primer\_1\_fwd  
AATTGGCTCTTTGGAGGCCGA  
>Distal\_primer\_1\_rev  
GCGGATGCTGGGAGAATCTA

>Distal\_primer\_2\_fwd  
TAGCCAGTCTGCTGTCCTGA  
>Distal\_primer\_2\_rev  
GGGTTGCGAGATCTCTTGTGG

### **Timp3 protein production estimation**

An estimate of the rate of Timp3 protein production per cell per hour was calculated using the ELISA Timp3 measurements and cell counts at each hour. The extracellular Timp3 concentration from the ELISA measurements were converted from ng/mL to ng's of Timp3 per cell using the known culture volume of 2 mLs and the cell counts at the same time point. This value represents the amount of extracellular Timp3 per cell; in order to calculate how much Timp3 is produced, the amount of degraded Timp3 between timepoints is estimated from the tissue-culture half-life estimate of 15 hours (Mao *et al.*, 2021). The Timp3 protein production per cell at time  $t_2$  is estimated to be the difference between the amount of Timp3 at  $t_2$  and the previous timepoint  $t_1$ , plus the degraded Timp3 fraction from  $t_1$ , divided by the number of cells at  $t_2$ .

### **qPCR analysis of pericyte culture Timp3 3' UTR abundance**

Our goal is to estimate the relative abundance of the short vs. long Timp3 3' UTR isoforms at multiple time-points during cell culture. The ratio of short to long Timp3 3' UTR isoform in a sample can be estimated using the proximal and distal qPCR primer critical threshold (CT) values. Let the amount of template present in the sample which can be amplified by the proximal qPCR primer be represented as  $P$ . Similarly let the un-amplified amount of template for the distal primer be represented as  $D$ .

At the critical threshold number of cycles for both the distal  $CT_D$  and proximal  $CT_P$  qPCR primers, the absorbances will be equal. Assuming that the initial amount of template  $P$  and  $D$  doubles in each cycle we can create an equation to solve for the ratio of  $\frac{P}{D}$

$$P * 2^{CT_P} = D * 2^{CT_D}$$
$$\frac{P}{D} = \frac{2^{CT_D}}{2^{CT_P}} = 2^{CT_D - CT_P}$$

Since the proximal primers can amplify both the short and long isoforms, while the distal primers can only amplify the long isoforms we can rewrite the previous equation with  $S$  and  $L$  representing the amount of short and long Timp3 3' UTR template in each sample.

$$\frac{S+L}{L} = 2^{CT_D - CT_P}$$

Since  $S > 0$  and  $L > 0$ , we expect  $2^{CT_D - CT_P} > 1$ , however, we observe 219 of 240 qPCR biological/technical replicates having  $2^{CT_D - CT_P} < 1$ .

We at first considered that this discrepancy may be due to differences in the amplification efficiency of the proximal and distal qPCR primers which are assumed to be equal and 100% efficient with a doubling in each PCR cycle. However, if for some reason the proximal and distal primers had different efficiencies, it would be incorrect to directly compare their CT values. We estimated the efficiencies of the proximal 1, proximal 2, distal 1, and distal 2 qPCR primers by measuring the CT values at 2-fold dilutions of the same cDNA template and observed that all primer pairs had near 100% efficiency except for proximal primer 1 which had 82% efficiency (Supplemental Figure 6). For the qPCR analyses presented in this paper, proximal primer 2 and distal primer 2 were used. Efficiency calculations were made by finding the slope,  $m$ , of the line of best fit for ( $x = \log_2$  cDNA dilution) vs. ( $y = CT$ ) and then converting slope to efficiency as  $(100/2^{(m-1)})$ .

Given that qPCR efficiency is not the cause of the widely observed  $\frac{S+L}{L} < 1$  ratios, we believe that the existence of a template which is only amplified by the distal and not the proximal qPCR primer pairs could be confounding. Such templates could arise from incomplete reverse transcription or spliced Timp3 3' UTR isoforms. While we do not have a way to control for this in the current qPCR experiment, we might expect to observe the same external effect at each timepoint.



## Acknowledgements

We'd like to acknowledge the Salzman lab members for helpful discussion and suggestions, especially Elisabeth Meyer, Roozbeh Dehghannasiri, and Tavor Baharav for text edits as well as Jonathan Liu from the Chan-Zuckerberg Biohub. We acknowledge George Emmanuel for help in initial data download and processing. We acknowledge Pehr Harbury and Mark Krasnow for feedback and Mark Krasnow and Catherine Blish for the human lung ex-situ culture time-course datasets. Some of the computing for this project was performed on the Sherlock cluster. We would like to thank Stanford University and the Stanford Research Computing Center for providing computational resources and support that contributed to these research results. We would like to thank funding sources from the NCI (5F31CA243170-02), the NHGRI (1R56HG011231-01) and NIGMS (1R35GM139517-01). This research was supported in part by a training grant from NIH Cellular and Molecular Training Grant (NIGMS, grant number 5T32GM007276). Support also came from (R35HL150766, 1R21NS123469 to D.M.G.), American Heart Association (Established Investigator Award, 19EIA34660321 to D.M.G. and Career Development Award, 856332 to J.M.D.).

## References

### Bibliography

- Banisadr G, Bhattacharyya BJ, Belmadani A, Izen SC, Ren D, Tran PB, et al. The chemokine BRAK/CXCL14 regulates synaptic transmission in the adult mouse dentate gyrus stem cell niche. *J Neurochem* 2011; 119: 1173–82.
- Bässler EL, Ngo-Anh TJ, Geisler HS, Ruppertsberg JP, Gründer S. Molecular and functional characterization of acid-sensing ion channel (ASIC) 1b. *J Biol Chem* 2001; 276: 33782–7.
- Benjamini Y, Hochberg Y. Controlling the False Discovery Rate: A Practical and Powerful Approach to Multiple Testing. *Journal of the Royal Statistical Society Series B (Methodological)* 1995; 57: 289–300.
- Berkovits BD, Mayr C. Alternative 3' UTRs act as scaffolds to regulate membrane protein localization. *Nature* 2015; 522: 363–7.
- Bertrand E, Chartrand P, Schaefer M, Shenoy SM, Singer RH, Long RM. Localization of ASH1 mRNA particles in living yeast. *Mol Cell* 1998; 2: 437–45.
- Billingsley P. PROBABILITY AND MEASURE, 3RD EDITION (WILEY SERIES IN PROBABILITY AND MATHEMATICAL STATISTICS). 3rd ed. WI; 1995
- Black S, Phillips D, Hickey JW, Kennedy-Darling J, Venkataraman VG, Samusik N, et al. CODEX multiplexed tissue imaging with DNA-conjugated antibodies. *Nat Protoc* 2021; 16: 3802–35.
- Booeshaghi AS, Yao Z, van Velthoven C, Smith K, Tasic B, Zeng H, et al. Isoform cell-type

specificity in the mouse primary motor cortex. *Nature* 2021; 598: 195–9.

Born G, Breuer D, Wang S, Rohlmann A, Coulon P, Vakili P, et al. Modulation of synaptic function through the  $\alpha$ -neurexin-specific ligand neurexophilin-1. *Proc Natl Acad Sci USA* 2014; 111: E1274-83.

BRAIN Initiative Cell Census Network (BICCN). A multimodal cell census and atlas of the mammalian primary motor cortex. *Nature* 2021; 598: 86–102.

Capone C, Dabertrand F, Baron-Menguy C, Chalaris A, Ghezali L, Domenga-Denier V, et al. Mechanistic insights into a TIMP3-sensitive pathway constitutively engaged in the regulation of cerebral hemodynamics. *eLife* 2016; 5

Chang P, Torres J, Lewis RA, Mowry KL, Houliston E, King ML. Localization of RNAs to the mitochondrial cloud in *Xenopus* oocytes through entrapment and association with endoplasmic reticulum. *Mol Biol Cell* 2004; 15: 4669–81.

Chang K, Baharav T, Zheludev I, Salzman J. A statistical, reference-free algorithm subsumes myriad problems in genome science and enables novel discovery. *BioRxiv* 2022

Coelho LP, Shariff A, Murphy RF. Nuclear segmentation in microscope cell images: a hand-segmented dataset and comparison of algorithms. *Proc IEEE Int Symp Biomed Imaging* 2009; 5193098: 518–21.

Das S, Singer RH, Yoon YJ. The travels of mRNAs in neurons: do they know where they are going? *Curr Opin Neurobiol* 2019; 57: 110–6.

Di Tommaso P, Chatzou M, Floden EW, Barja PP, Palumbo E, Notredame C. Nextflow enables reproducible computational workflows. *Nat Biotechnol* 2017; 35: 316–9.

Durkee MS, Abraham R, Clark MR, Giger ML. Artificial intelligence and cellular segmentation in tissue microscopy images. *Am J Pathol* 2021; 191: 1693–701.

Ebihara S, Obata K, Yanagawa Y. Mouse vesicular GABA transporter gene: genomic organization, transcriptional regulation and chromosomal localization. *Brain Res Mol Brain Res* 2003; 110: 126–39.

Emanuel G, Seichhorn, Babcock H, Leonardosepulveda, Timblosser. ZhuangLab/MERlin: MERlin v0.1.6. Zenodo 2020

Eng C-HL, Lawson M, Zhu Q, Dries R, Koulina N, Takei Y, et al. Transcriptome-scale super-resolved imaging in tissues by RNA seqFISH. *Nature* 2019; 568: 235–9.

Fazal FM, Han S, Parker KR, Kaewsapsak P, Xu J, Boettiger AN, et al. Atlas of Subcellular RNA Localization Revealed by APEX-Seq. *Cell* 2019; 178: 473-490.e26.

Florentino L, Cavalera M, Mavilio M, Conserva F, Menghini R, Gesualdo L, et al. Regulation of TIMP3 in diabetic nephropathy: a role for microRNAs. *Acta Diabetol* 2013; 50: 965–9.

Gasnier B. The SLC32 transporter, a key protein for the synaptic release of inhibitory amino acids. *Pflugers Arch* 2004; 447: 756–9.

Hachet O, Ephrussi A. Splicing of oskar RNA in the nucleus is coupled to its cytoplasmic localization. *Nature* 2004; 428: 959–63.

- Hentze MW, Castello A, Schwarzl T, Preiss T. A brave new world of RNA-binding proteins. *Nat Rev Mol Cell Biol* 2018; 19: 327–41.
- Holt CE, Bullock SL. Subcellular mRNA localization in animal cells and why it matters. *Science* 2009; 326: 1212–6.
- Hromas R, Broxmeyer HE, Kim C, Nakshatri H, Christopherson K, Azam M, et al. Cloning of BRAK, a novel divergent CXC chemokine preferentially expressed in normal versus malignant cells. *Biochem Biophys Res Commun* 1999; 255: 703–6.
- Hung M-C, Link W. Protein localization in disease and therapy. *J Cell Sci* 2011; 124: 3381–92.
- Hu J, Ni S, Cao Y, Zhang T, Wu T, Yin X, et al. The Angiogenic Effect of microRNA-21 Targeting TIMP3 through the Regulation of MMP2 and MMP9. *PLoS ONE* 2016; 11: e0149537.
- Jin J, Sison K, Li C, Tian R, Wnuk M, Sung H-K, et al. Soluble FLT1 binds lipid microdomains in podocytes to control cell morphology and glomerular barrier function. *Cell* 2012; 151: 384–99.
- Kanai Y, Dohmae N, Hirokawa N. Kinesin transports RNA: isolation and characterization of an RNA-transporting granule. *Neuron* 2004; 43: 513–25.
- Kang J, Tang Q, He J, Li L, Yang N, Yu S, et al. RNAInter v4.0: RNA interactome repository with redefined confidence scoring system and improved accessibility. *Nucleic Acids Res* 2022; 50: D326–32.
- Keren L, Bosse M, Thompson S, Risom T, Vijayaragavan K, McCaffrey E, et al. MIBI-TOF: A multiplexed imaging platform relates cellular phenotypes and tissue structure. *Sci Adv* 2019; 5: eaax5851.
- Kislauskis EH, Zhu X, Singer RH. Sequences responsible for intracellular localization of beta-actin messenger RNA also affect cell phenotype. *J Cell Biol* 1994; 127: 441–51.
- Kislauskis EH, Zhu X, Singer RH. beta-Actin messenger RNA localization and protein synthesis augment cell motility. *J Cell Biol* 1997; 136: 1263–70.
- Lawrence JB, Singer RH. Intracellular localization of messenger RNAs for cytoskeletal proteins. *Cell* 1986; 45: 407–15.
- Lécuyer E, Yoshida H, Parthasarathy N, Alm C, Babak T, Cerovina T, et al. Global analysis of mRNA localization reveals a prominent role in organizing cellular architecture and function. *Cell* 2007; 131: 174–87.
- Lee BT, Barber GP, Benet-Pagès A, Casper J, Clawson H, Diekhans M, et al. The UCSC Genome Browser database: 2022 update. *Nucleic Acids Res* 2022; 50: D1115–22.
- Lipshitz HD, Smibert CA. Mechanisms of RNA localization and translational regulation. *Curr Opin Genet Dev* 2000; 10: 476–88.
- Liu J, Tran V, Pranathi Vemuri VN, Byrne A, Borja M, Agarwal S, et al. Comparative analysis of MERFISH spatial transcriptomics with bulk and single-cell RNA sequencing. *BioRxiv* 2022
- Mah CK, Ahmed N, Lam D, Monell A, Kern C, Han Y, et al. Bento: A toolkit for subcellular analysis of spatial transcriptomics data. *BioRxiv* 2022
- Mao S, Zhang D, Chen L, Tan J, Chu Y, Huang S, et al. FKBP51 promotes invasion and

migration by increasing the autophagic degradation of TIMP3 in clear cell renal cell carcinoma. *Cell Death Dis* 2021; 12: 899.

Marx V. Method of the Year: spatially resolved transcriptomics. *Nat Methods* 2021; 18: 9–14.

Mayford M, Baranes D, Podsypanina K, Kandel ER. The 3'-untranslated region of CaMKII alpha is a cis-acting signal for the localization and translation of mRNA in dendrites. *Proc Natl Acad Sci USA* 1996; 93: 13250–5.

Ma W, Mayr C. A Membraneless Organelle Associated with the Endoplasmic Reticulum Enables 3'UTR-Mediated Protein-Protein Interactions. *Cell* 2018; 175: 1492-1506.e19.

McGeary SE, Lin KS, Shi CY, Pham TM, Bisaria N, Kelley GM, et al. The biochemical basis of microRNA targeting efficacy. *Science* 2019; 366

Meyer E, Chaung K, Dehghannasiri R, Salzman J. ReadZS detects cell type-specific and developmentally regulated RNA processing programs in single-cell RNA-seq. *Genome Biol* 2022; 23: 226.

Meyer E, Dehghannasiri R, Chaung K, Salzman J. ReadZS detects developmentally regulated RNA processing programs in single cell RNA-seq and defines subpopulations independent of gene expression. *BioRxiv* 2021

Minis A, Dahary D, Manor O, Leshkowitz D, Pilpel Y, Yaron A. Subcellular transcriptomics-dissection of the mRNA composition in the axonal compartment of sensory neurons. *Dev Neurobiol* 2014; 74: 365–81.

Moffitt JR, Bambah-Mukku D, Eichhorn SW, Vaughn E, Shekhar K, Perez JD, et al. Molecular, spatial, and functional single-cell profiling of the hypothalamic preoptic region. *Science* 2018; 362

Moffitt JR, Hao J, Wang G, Chen KH, Babcock HP, Zhuang X. High-throughput single-cell gene-expression profiling with multiplexed error-robust fluorescence in situ hybridization. *Proc Natl Acad Sci USA* 2016; 113: 11046–51.

Moran PAP. Notes on continuous stochastic phenomena. *Biometrika* 1950; 37: 17–23.

Müller-McNicoll M, Neugebauer KM. How cells get the message: dynamic assembly and function of mRNA-protein complexes. *Nat Rev Genet* 2013; 14: 275–87.

Nitta T, Hata M, Gotoh S, Seo Y, Sasaki H, Hashimoto N, et al. Size-selective loosening of the blood-brain barrier in claudin-5-deficient mice. *J Cell Biol* 2003; 161: 653–60.

Olivieri JE, Dehghannasiri R, Salzman J. The SpliZ generalizes “percent spliced in” to reveal regulated splicing at single-cell resolution. *Nat Methods* 2022; 19: 307–10.

Olivieri JE, Dehghannasiri R, Wang PL, Jang S, de Morree A, Tan SY, et al. RNA splicing programs define tissue compartments and cell types at single-cell resolution. *eLife* 2021; 10

Padrón A, Ingolia N. Analyzing the Composition and Organization of Ribonucleoprotein Complexes by APEX-Seq. *Methods Mol Biol* 2022; 2428: 277–89.

Rongo C, Gavis ER, Lehmann R. Localization of oskar RNA regulates oskar translation and requires Oskar protein. *Development* 1995; 121: 2737–46.

- Saka HA, Valdivia R. Emerging roles for lipid droplets in immunity and host-pathogen interactions. *Annu Rev Cell Dev Biol* 2012; 28: 411–37.
- Samacoits A, Chouaib R, Safieddine A, Traboulsi A-M, Ouyang W, Zimmer C, et al. A computational framework to study sub-cellular RNA localization. *Nat Commun* 2018; 9: 4584.
- Savojardo C, Martelli PL, Fariselli P, Casadio R. DeepSig: deep learning improves signal peptide detection in proteins. *Bioinformatics* 2018; 34: 1690–6.
- Schrimpf C, Xin C, Campanholle G, Gill SE, Stallcup W, Lin S-L, et al. Pericyte TIMP3 and ADAMTS1 modulate vascular stability after kidney injury. *J Am Soc Nephrol* 2012; 23: 868–83.
- Shibuya M, Yamaguchi S, Yamane A, Ikeda T, Tojo A, Matsushime H, et al. Nucleotide sequence and expression of a novel human receptor-type tyrosine kinase gene (flt) closely related to the fms family. *Oncogene* 1990; 5: 519–24.
- Ståhl PL, Salmén F, Vickovic S, Lundmark A, Navarro JF, Magnusson J, et al. Visualization and analysis of gene expression in tissue sections by spatial transcriptomics. *Science* 2016; 353: 78–82.
- Sticht C, De La Torre C, Parveen A, Gretz N. miRWalk: An online resource for prediction of microRNA binding sites. *PLoS ONE* 2018; 13: e0206239.
- Stickels RR, Murray E, Kumar P, Li J, Marshall JL, Di Bella DJ, et al. Highly sensitive spatial transcriptomics at near-cellular resolution with Slide-seqV2. *Nat Biotechnol* 2021; 39: 313–9.
- Suter B. RNA localization and transport. *Biochim Biophys Acta Gene Regul Mech* 2018; 1861: 938–51.
- Su G, Qin X, Enniful A, Bai Z, Deng Y, Liu Y, et al. Spatial multi-omics sequencing for fixed tissue via DBiT-seq. *STAR Protocols* 2021; 2: 100532.
- Tabula Sapiens Consortium\*, Jones RC, Karkanias J, Krasnow MA, Pisco AO, Quake SR, et al. The Tabula Sapiens: A multiple-organ, single-cell transcriptomic atlas of humans. *Science* 2022; 376: eabl4896.
- Tang Q, Nie F, Kang J, Chen W. mRNALocater: enhance the prediction accuracy of eukaryotic mRNA subcellular localization by using model fusion strategy. *Mol Ther* 2021
- Thomas RM, John J. A review on cell detection and segmentation in microscopic images. In: 2017 International Conference on Circuit ,Power and Computing Technologies (ICCPCT). IEEE; 2017. p. 1–5
- toblerity.org SG. Shapely: manipulation and analysis of geometric objects. 2007
- Vicar T, Balvan J, Jaros J, Jug F, Kolar R, Masarik M, et al. Cell segmentation methods for label-free contrast microscopy: review and comprehensive comparison. *BMC Bioinformatics* 2019; 20: 360.
- Vizgen. Data Release Program - Vizgen [Internet]. [cited 2020 Apr 27] Available from: <https://vizgen.com/data-release-program/>
- Weber BH, Vogt G, Pruett RC, Stöhr H, Felbor U. Mutations in the tissue inhibitor of metalloproteinases-3 (TIMP3) in patients with Sorsby's fundus dystrophy. *Nat Genet* 1994; 8:

352–6.

Westrich JA, Vermeer DW, Colbert PL, Spanos WC, Pyeon D. The multifarious roles of the chemokine CXCL14 in cancer progression and immune responses. *Mol Carcinog* 2020; 59: 794–806.

Wilson SC, White KI, Zhou Q, Pfuetzner RA, Choi UB, Südhof TC, et al. Structures of neurexophilin-neurexin complexes reveal a regulatory mechanism of alternative splicing. *EMBO J* 2019; 38: e101603.

Wolf FA, Angerer P, Theis FJ. SCANPY: large-scale single-cell gene expression data analysis. *Genome Biol* 2018; 19: 15.

Xia C, Fan J, Emanuel G, Hao J, Zhuang X. Spatial transcriptome profiling by MERFISH reveals subcellular RNA compartmentalization and cell cycle-dependent gene expression. *Proc Natl Acad Sci USA* 2019; 116: 19490–9.

Xue Z-Z, Wu Y, Gao Q-Z, Zhao L, Xu Y-Y. Automated classification of protein subcellular localization in immunohistochemistry images to reveal biomarkers in colon cancer. *BMC Bioinformatics* 2020; 21: 398.

Yao Z, Liu H, Xie F, Fischer S, Adkins RS, Aldridge AI, et al. A transcriptomic and epigenomic cell atlas of the mouse primary motor cortex. *Nature* 2021; 598: 103–10.

Yisraeli JK. VICKZ proteins: a multi-talented family of regulatory RNA-binding proteins. *Biol Cell* 2005; 97: 87–96.

Zappulo A, van den Bruck D, Ciolli Mattioli C, Franke V, Imami K, McShane E, et al. RNA localization is a key determinant of neurite-enriched proteome. *Nat Commun* 2017; 8: 583.

Zhang M, Eichhorn SW, Zingg B, Yao Z, Cotter K, Zeng H, et al. Spatially resolved cell atlas of the mouse primary motor cortex by MERFISH. *Nature* 2021; 598: 137–43.

Zhang M, Eichhorn SW, Zingg B, Yao Z, Zeng H, Dong H, et al. Molecular, spatial and projection diversity of neurons in primary motor cortex revealed by in situ single-cell transcriptomics. *BioRxiv* 2020

## Figures

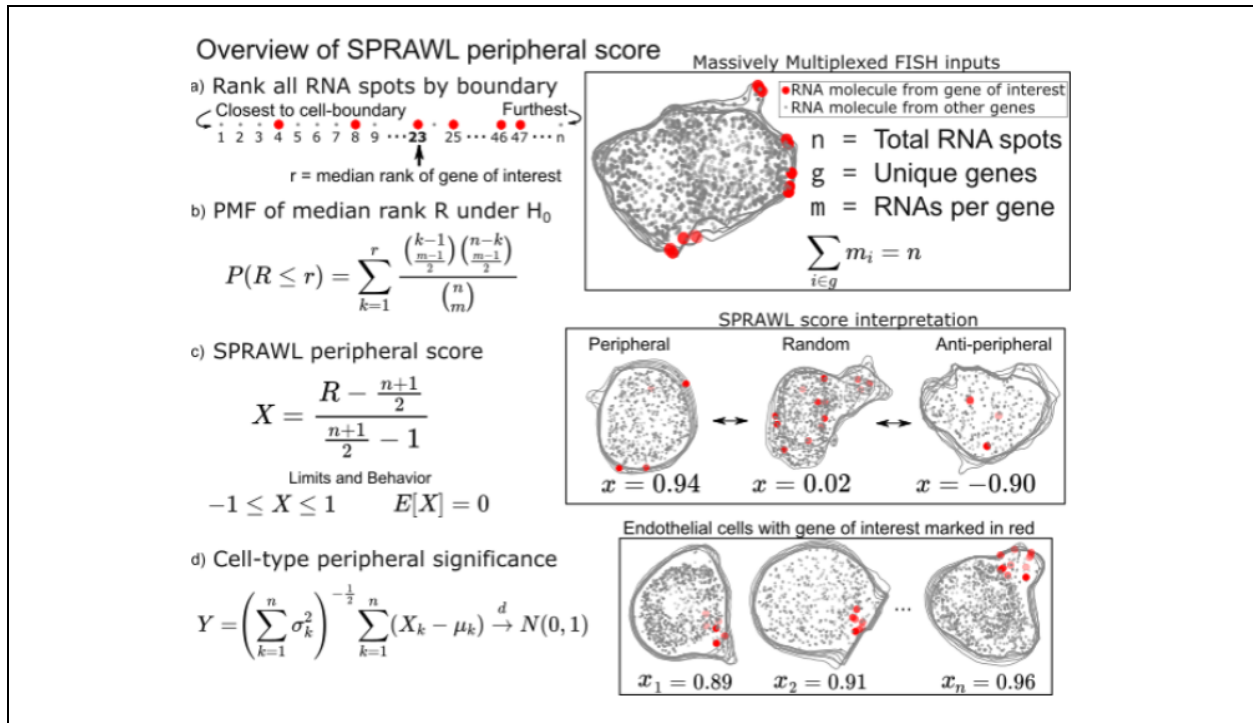

**Figure 1: SPRAWL peripheral and central score workflow.** a) RNAs are ranked from closest to furthest from the cell-boundary to calculate the median peripheral rank of the gene of interest. For the central metric, distances from the cell centroid are used for ranking instead. b) Under the null hypothesis of each rank being equally likely, the probability mass function of the median is exactly calculable. c) The intuitive SPRAWL score per gene per cell,  $X$ , will be near +1 for highly-peripheral patterns, near 0 for randomly-peripheral patterns, and near -1 for anti-peripheral patterns. d) Peripheral significance of a gene within a cell-type is estimated from per cell SPRAWL scores using the Lyapunov Central Limit Theorem (CLT).

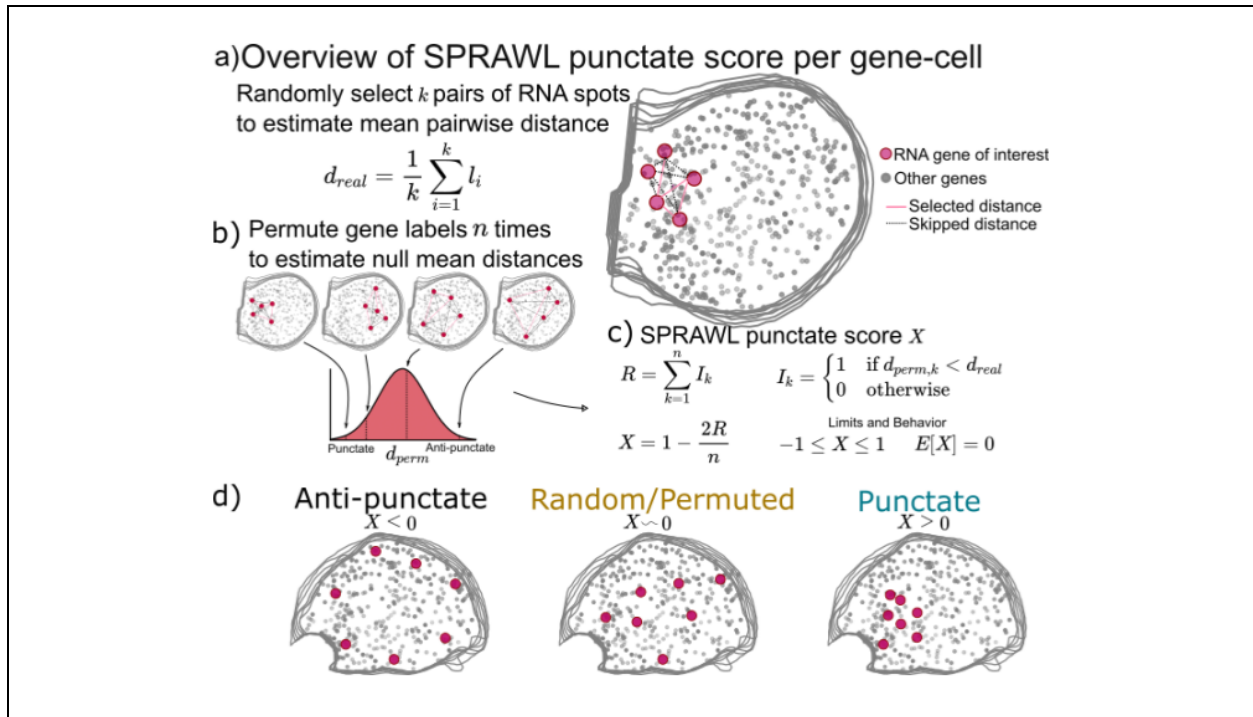

**Figure 2: SPRAWL punctate and radial scores workflow.** a) The SPRAWL punctate metric relies on b) permutation testing to create a score c) that represents whether RNA molecules from the gene of interest are closer together than expected by chance. The radial metric is identically calculated, except using average angle instead of distance. The significance of gene-celltype punctate patterns is calculated using the Lyapunov CLT as in the peripheral metric. b) Depictions and interpretation of the SPRAWL punctate metric.



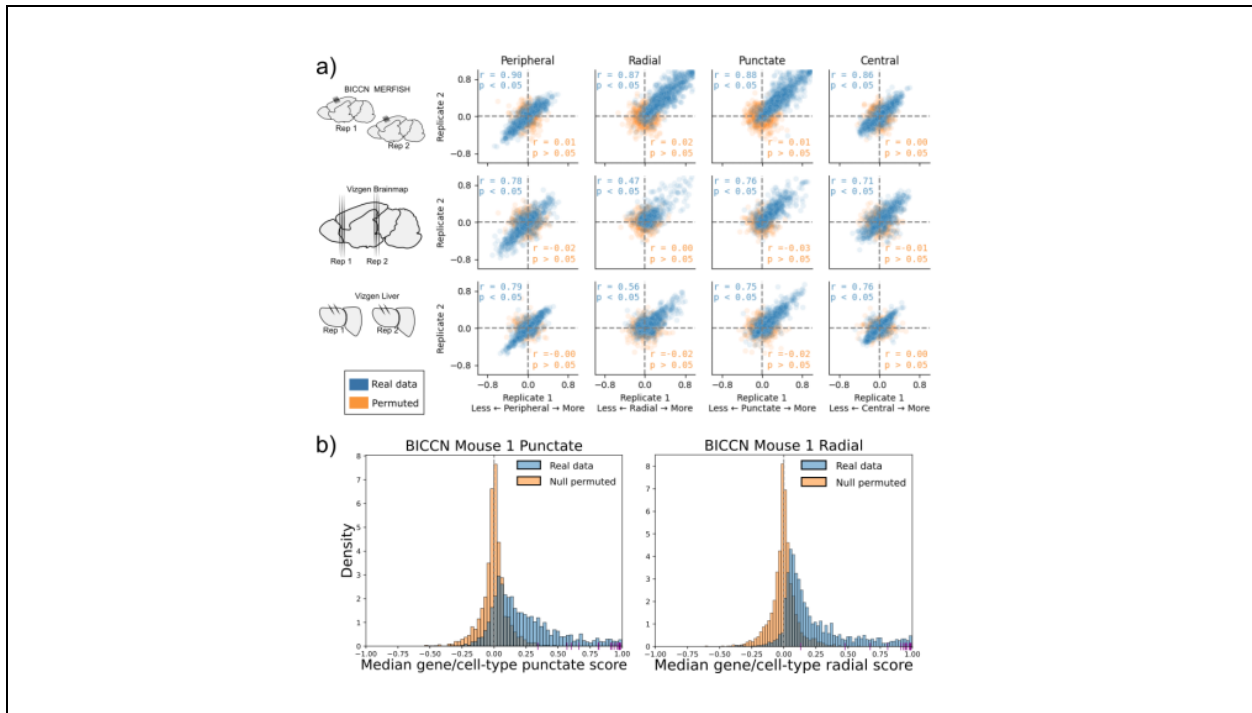

**Figure 3: SPRAWL gene-celltype scores are highly correlated between biological replicates.** a) BICCN MERFISH, Vizgen Brainmap, and Vizgen Liver biological replicates (rows top to bottom) have Pearson correlation coefficients (blue) larger than 0.47 for SPRAWL peripheral, radial, punctate, and central metrics (columns left to right). Randomly permuting gene labels in these datasets eliminates underlying spatial patterning and yields insignificant Pearson correlation coefficients (orange) between biological replicates. Dotted lines indicate zero-valued SPRAWL gene-celltype scores. b) In the MOp BICCN dataset 87% of gene/cell-type pairs have positive punctate RNA patterning (blue), compared to 50% in the gene-label permuted data (orange). Similarly extreme trends of 95% and 52% are observed for the radial metric. *Cldn5* RNA is consistently highly punctate and radial in all cell-types that express it, depicted by purple x-axis ticks.

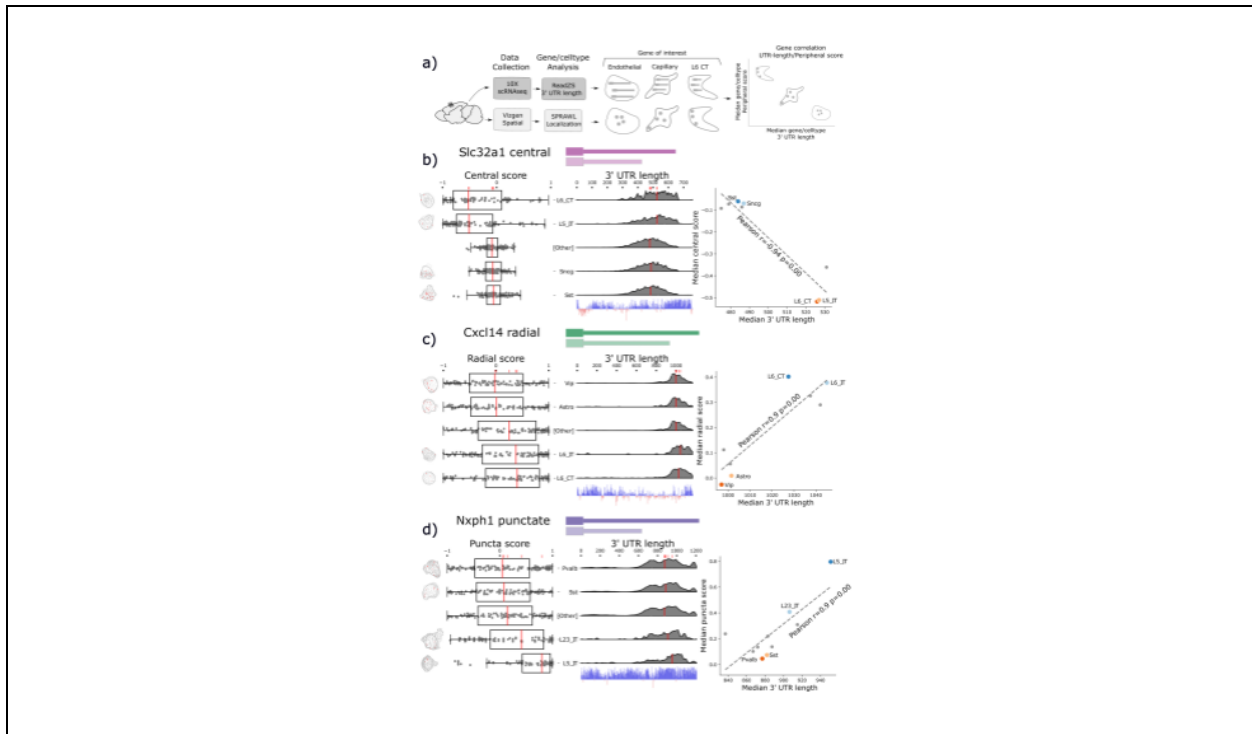

**Figure 4: SPRAWL spatial scores and 3' UTR length are significantly correlated for a subset of genes.** a) Workflow to calculate median 3' UTR length and spatial score per gene/cell-type. b) *Slc32a1* median centrality, c) *Cxcl14* radial, and d) *Nxph1* punctate SPRAWL scores from the BICCN MERFISH dataset correlate significantly with 3' UTR length determined from 10X scRNAseq data by ReadZS. The left-column boxplots show individual SPRAWL cell scores as overlaid dots. The cell-types are sorted by increasing median score marked in red. The two cell-types with the highest and lowest median SPRAWL scores are plotted individually while the remaining cell-types are collapsed into the “Other” category. Gene/cell examples are shown to the left the boxplots for each extreme cell-type group. The density plots in the middle column show estimated 3' UTR lengths for each read mapping within the annotated 3' UTR, stratified by cell-type. Lengths were approximated as the distance between the annotated start of the 3' UTR and the median read-mapping position. Each density plot is normalized by cell-type to show relative shifts in 3' UTR length with median lengths depicted with red lines. The scatterplots show the significant correlations between median SPRAWL score and median 3' UTR length. The two cell-types with the highest, and the two with the lowest SPRAWL median scores are highlighted.

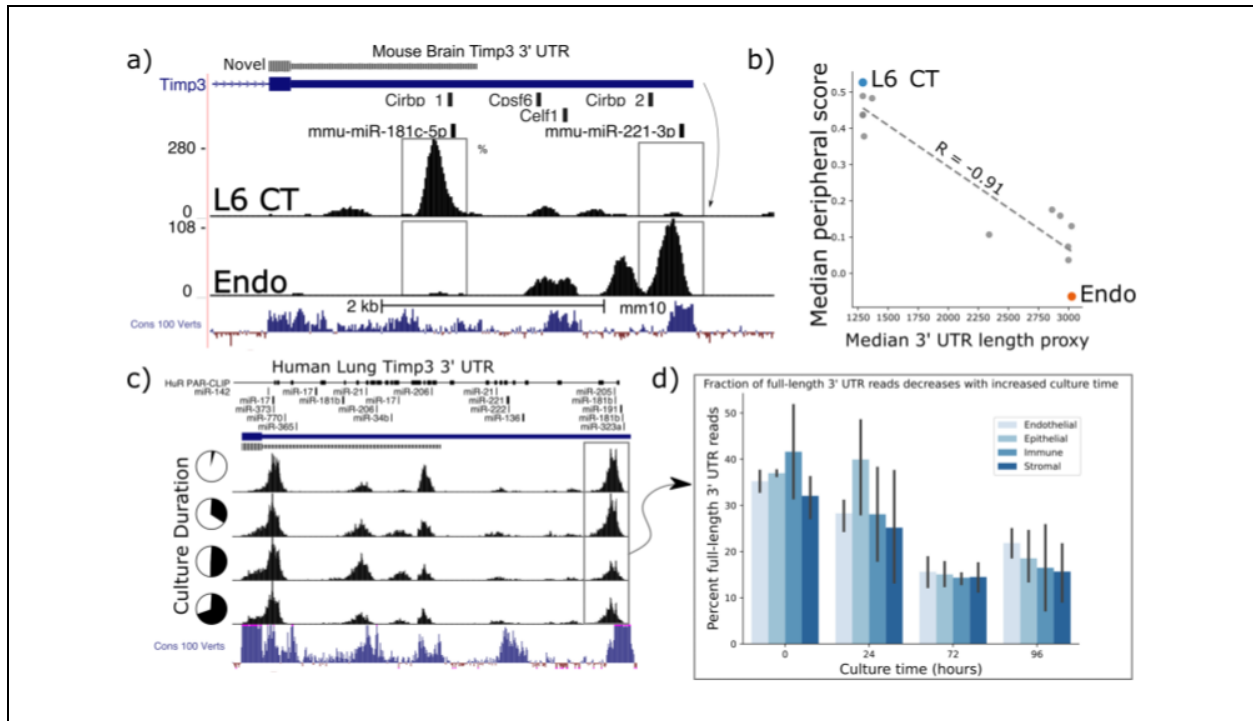

**Figure 5: *Timp3* alternative peripheral localization across MOp cell-types is statistically correlated with ReadZs differences in 3' UTR length.** a) ReadZs detects two major alternative 3' UTRs in mouse *Timp3* from 10X scRNAseq which correspond to miR-181c-5p and miR-221-3p binding sites. Reads from L6 CT cells predominantly map to a novel upstream shortened 3' UTR while endothelial cells primarily express the longer annotated 3' UTR. The UCSC genome browser placental animal sequence conservation shows highly conserved regions in blue. Fisher's exact test was highly significant between the two peaks denoted by the dotted lines between the two cell-types. b) *Timp3* mean periphery score is significantly correlated with *Timp3* median ReadZs score across MOp cell-types with Pearson correlation coefficient of -0.91 and  $p \ll 0.05$ . c) Fraction of *Timp3* RNA full-length 3' UTR reads, gray box and d) barplots, decreases during human lung tissue culture.

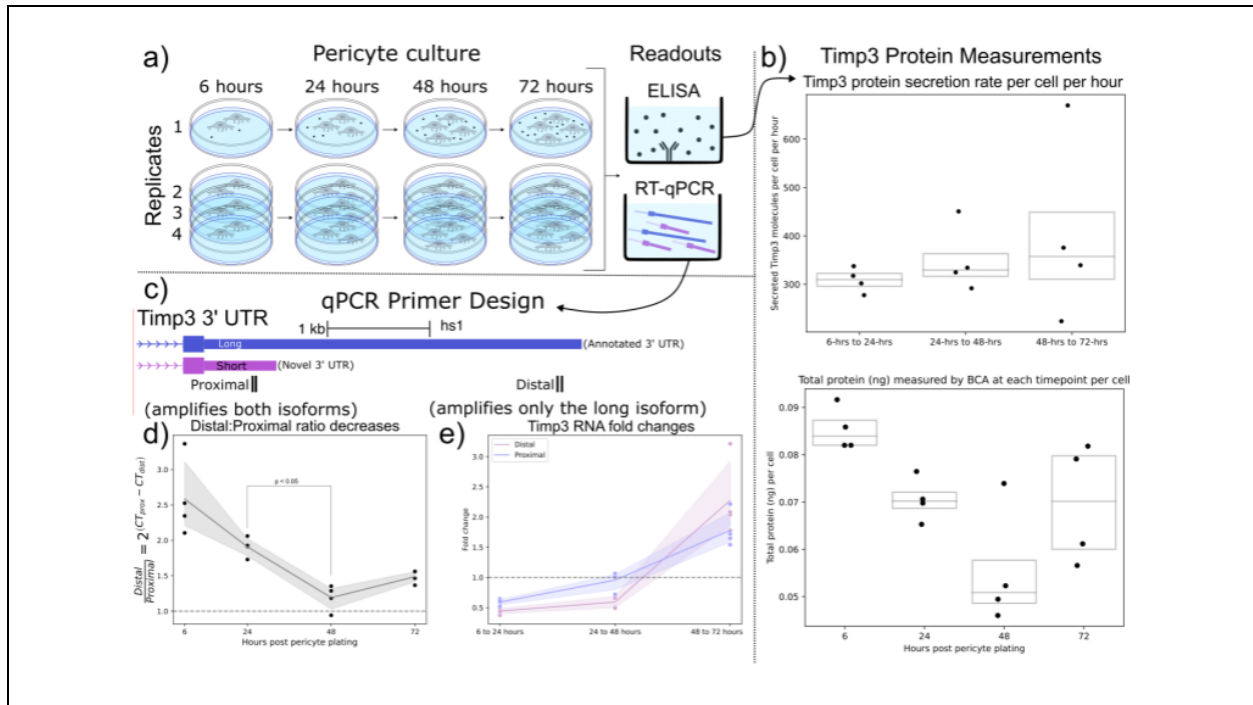

**Figure 6: Shorter Timp3 3' UTRs become relatively more abundant in pericyte cell culture while Timp3 protein production remains stable.** a) Experimental setup for human pericyte cell culture with reverse-transcriptase quantitative PCR (RT-qPCR) and extracellular Timp3 protein ELISA readouts at four time points. b) Timp3 protein secretion per cell per hour does not significantly change throughout culture time, even though the total protein measured by BCA does change. c) qPCR experiment design with proximal and distal qPCR primers to distinguish long and short 3' UTR isoforms. The proximal qPCR primer can detect both long and short isoforms while the distal primer can only amplify the long 3' UTR. d) The ratio of distal to proximal primer template abundances significantly decreases throughout culture time, implying increased usage of the short Timp3 3' UTR compared to the long isoform. e) Timp3 3' UTR abundance, normalized by 18s housekeeper abundance, fluctuates from halving to doubling between culture timepoints for both distal and proximal primers.

## Supplemental Figures

| Experiment      | Metric     | Unique genes | Significant genes | Bidirectional genes |
|-----------------|------------|--------------|-------------------|---------------------|
| Vizgen Brainmap | Peripheral | 589          | 224               | 3                   |
| Vizgen Brainmap | Central    | 589          | 208               | 2                   |
| Vizgen Brainmap | Radial     | 370          | 77                | 0                   |
| Vizgen Brainmap | Punctate   | 370          | 138               | 3                   |
| Vizgen Liver    | Peripheral | 385          | 380               | 215                 |
| Vizgen Liver    | Central    | 385          | 379               | 202                 |
| Vizgen Liver    | Punctate   | 385          | 323               | 64                  |
| BICCN MERFISH   | Peripheral | 252          | 251               | 92                  |
| BICCN MERFISH   | Central    | 252          | 249               | 96                  |
| BICCN MERFISH   | Radial     | 251          | 216               | 2                   |
| BICCN MERFISH   | Punctate   | 251          | 236               | 10                  |
| SeqFISH+        | Peripheral | 9805         | 155               | 0                   |
| SeqFISH+        | Central    | 9805         | 113               | 1                   |
| SeqFISH+        | Radial     | 2423         | 907               | 131                 |
| SeqFISH+        | Punctate   | 2423         | 815               | 83                  |
| CZB Kidney      | Peripheral | 307          | 273               | 44                  |
| CZB Kidney      | Central    | 307          | 270               | 58                  |
| CZB Kidney      | Radial     | 272          | 250               | 83                  |
| CZB Kidney      | Punctate   | 272          | 250               | 68                  |
| CZB Liver       | Peripheral | 305          | 249               | 44                  |
| CZB Liver       | Central    | 305          | 240               | 43                  |
| CZB Liver       | Radial     | 162          | 136               | 67                  |
| CZB Liver       | Punctate   | 162          | 136               | 28                  |

**Supplemental Table 1:** Counts of unique, significant, and opposite-effect genes in each experiment/metric combination. Genes are defined as significant if they are observed to be significant in at least cell-type in any replicate. Opposite-effect genes are those observed to have at least one significantly positive SPRAWL gene/cell-type score, and one significantly negative SPRAWL gene/cell-type score.

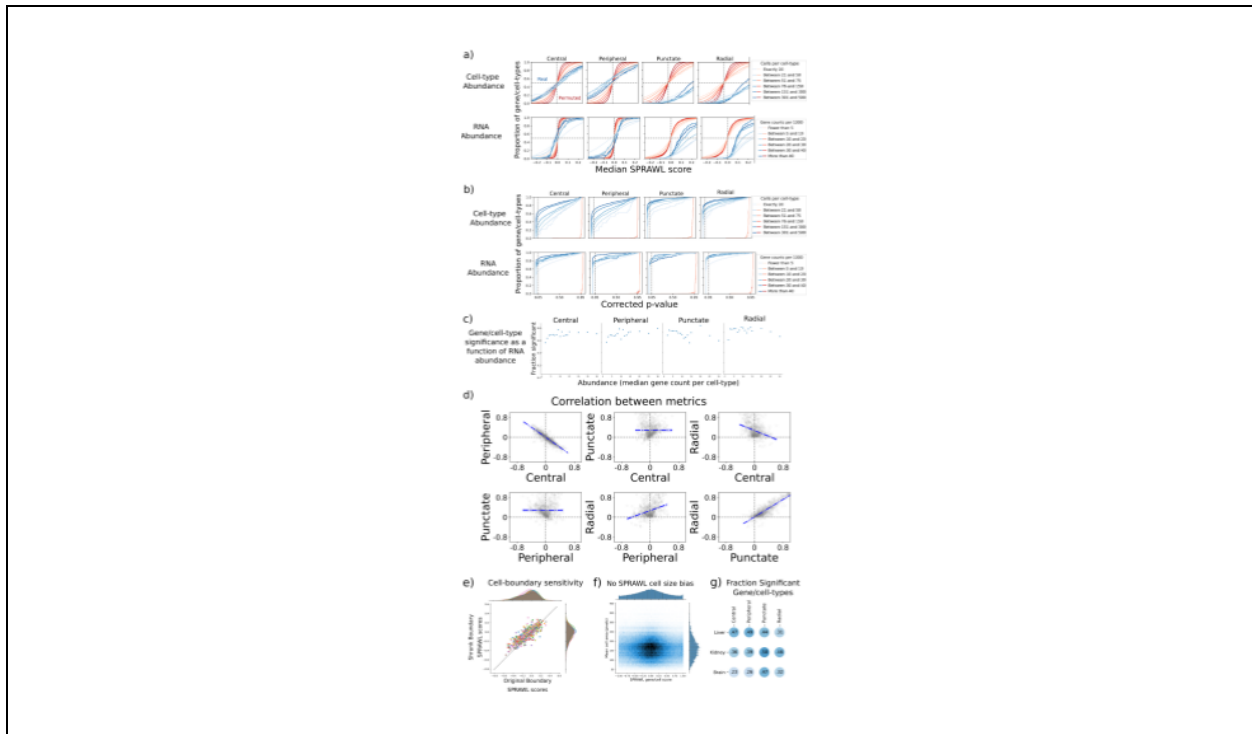

**Supplementary Figure 1:** SPRAWL metrics have high specificity and lack bias. a) SPRAWL scores for permuted null datasets, reds, have expected mean values of zero regardless of either the number of cells per cell-type or the gene abundance. The permuted datasets have expectedly lower variance for higher cells per cell-type and gene abundance. The real data, blue, shows expected means near 0 for the central and peripheral metrics, but higher scores for the punctate and radial metrics. b) Under null simulations, red lines, all gene/cell-type pairs are deemed insignificant at an alpha level of 0.05 (vertical dashed line) for the four metrics. In the real data, blue lines, more gene/cell-type pairs are significant, after Benjamini-Hochberg correction, with higher cell-type and RNA abundance. c) The fraction of significant gene/cell-type pairs in the BICCN samples are consistent across abundance levels measured as gene/cell-type median spot counts. d) Peripheral and central scores are strongly anti-correlated for gene/cell-type scores while the radial and punctate scores are positively correlated. e) To test whether peripheral localization patterns were driven artifactually by incorrect cell boundary calling, the cell boundary locations were computationally shrunk by a factor of 0.8 in the x and y direction, discarding spots that fell outside the new boundaries. In both the BICCN MOp and Vizgen Brainmap datasets, a Pearson correlation coefficient of greater than 0.85 was observed between the shrunk and original median gene/cell-type periphery scores. f) SPRAWL scores are not conflated with cell size g) Similar fractions of gene/cell-types are significant between the different datasets and metrics.

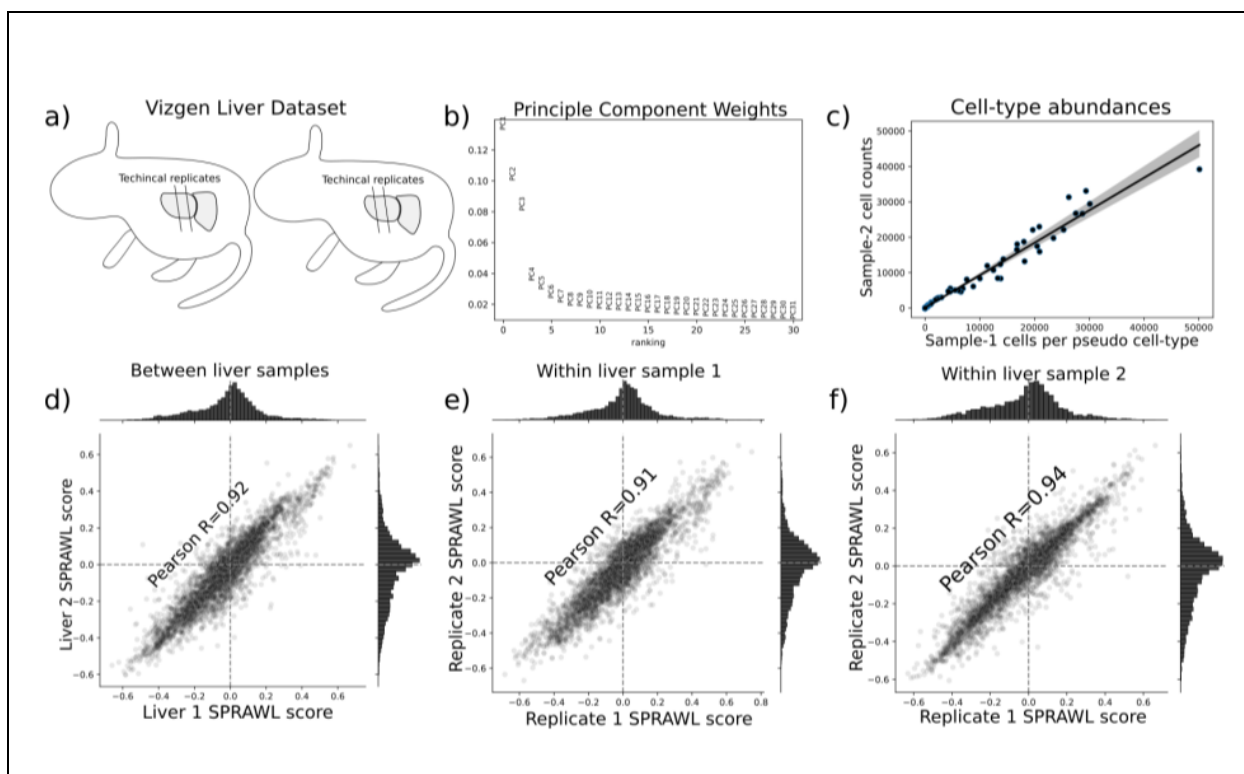

**Supplemental figure 2:** Vizgen Liver Showcase scores are highly correlated between replicates. a) The Vizgen Liver showcase dataset provides spatial information for 2 mouse livers with 2 slices each. Cell annotation data was not provided in the Vizgen Liver Showcase, instead clusters produced from off-the-shelf Leiden clustering (python scanpy package) were used as pseudo cell-types. All four datasets were combined without reference to biological or technical replicate by first normalizing the read counts per cell, identifying highly variable genes, reducing to the first 10 principle components (b) and then computing a neighbor graph with  $n = 40$  which resulted in 100 clusters which had similar number of cells from each animal (c). As well as having high Pearson correlation coefficient between mice (d), the technical replicates were highly correlated within both Liver 1 (e) and Liver 2 (f).

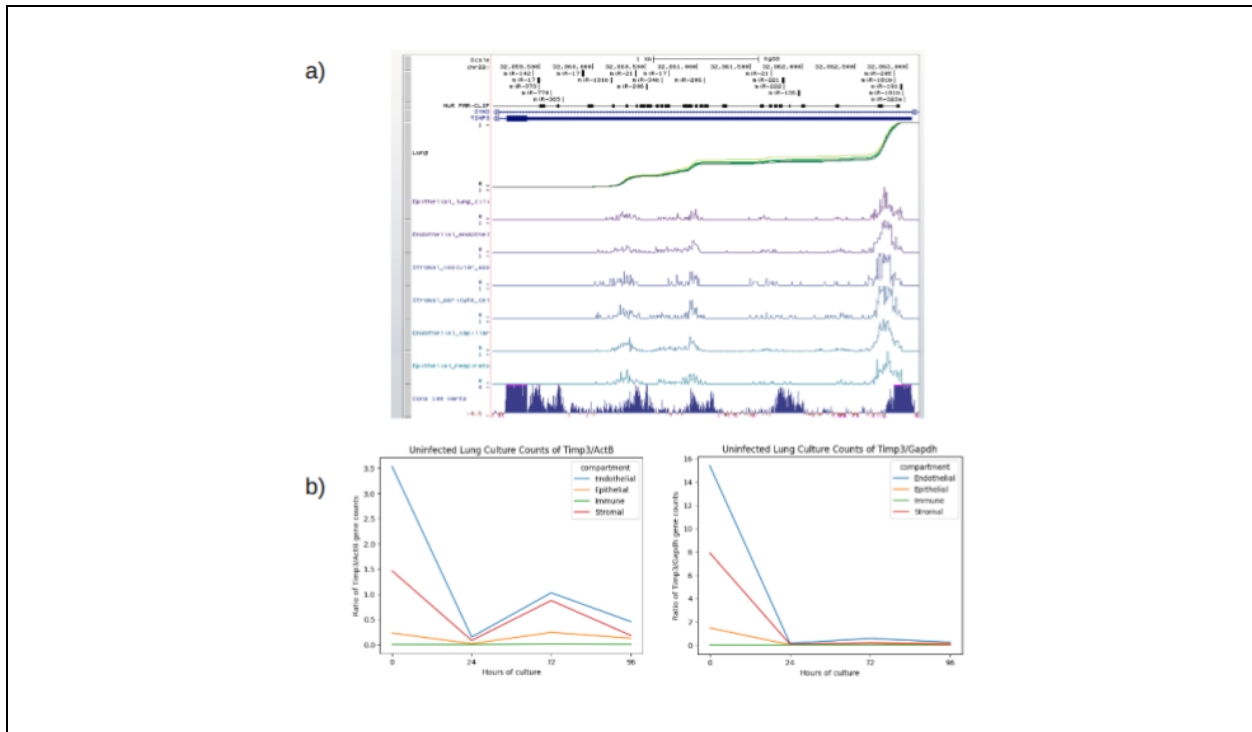

**Supplemental Figure 3:** ReadZS detects Tabula Sapiens Lung differential 3' UTR length Timp3 and decrease in Timp3 expression throughout culture a) ReadZS detects statistically significant 3' UTR length differences in the human Timp3 3' UTR across endothelial cell-types from the Tabula Sapiens consortium datasets. The eCDF plot below the gene annotation shows slight variation in read buildup over all cell-types below which individually show read-density. HuR binding sites from PAR-CLIP are shown above the Timp3 gene structure diagram. The last track shows high vertebrate sequence conservation throughout the UTR. b) Normalized expression of Timp3 against Actin and Gapdh show decreasing expression of Timp3 throughout increasing culture direction in all tissue compartments.



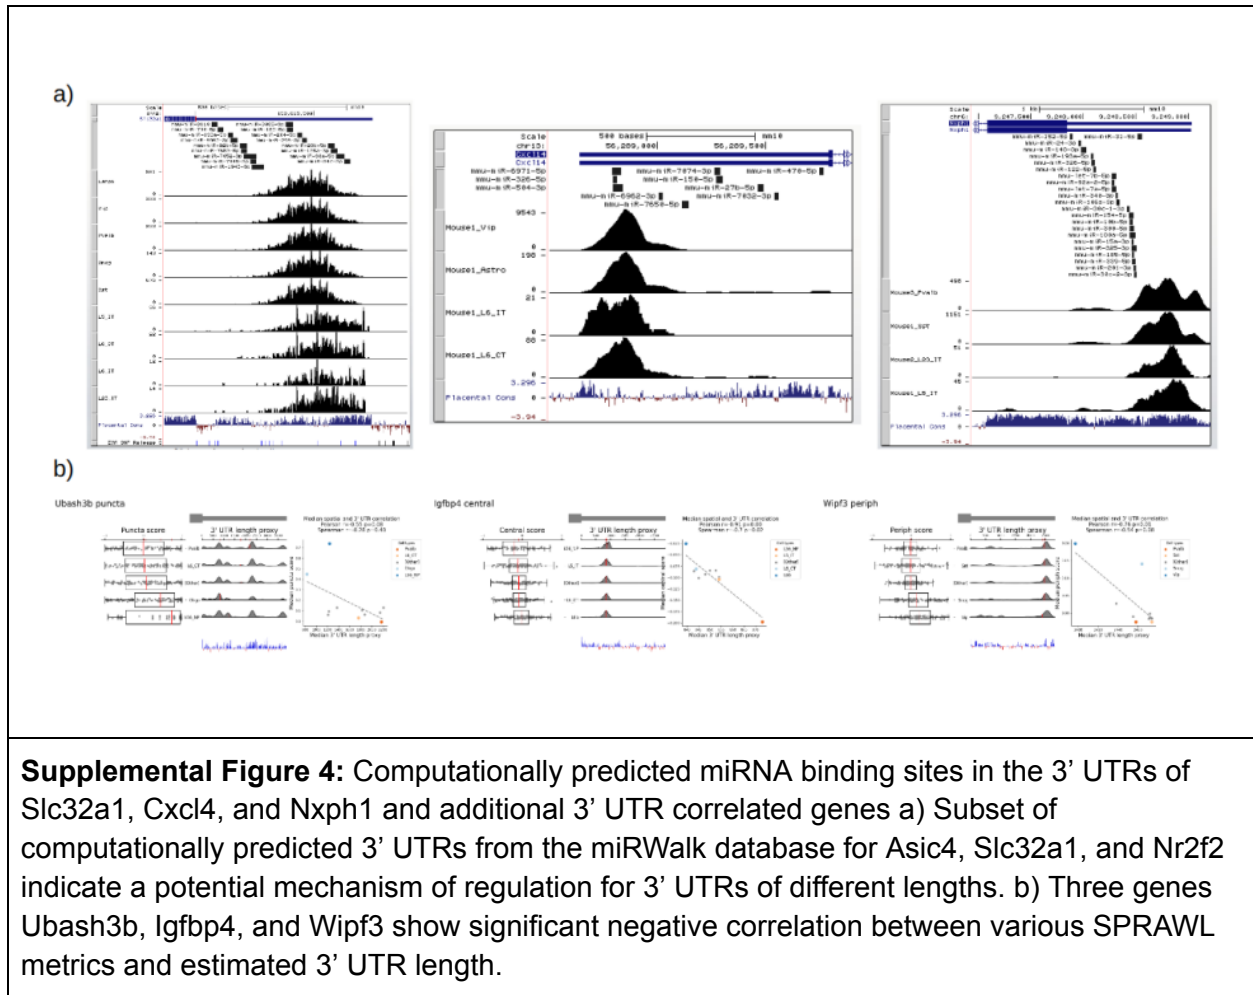

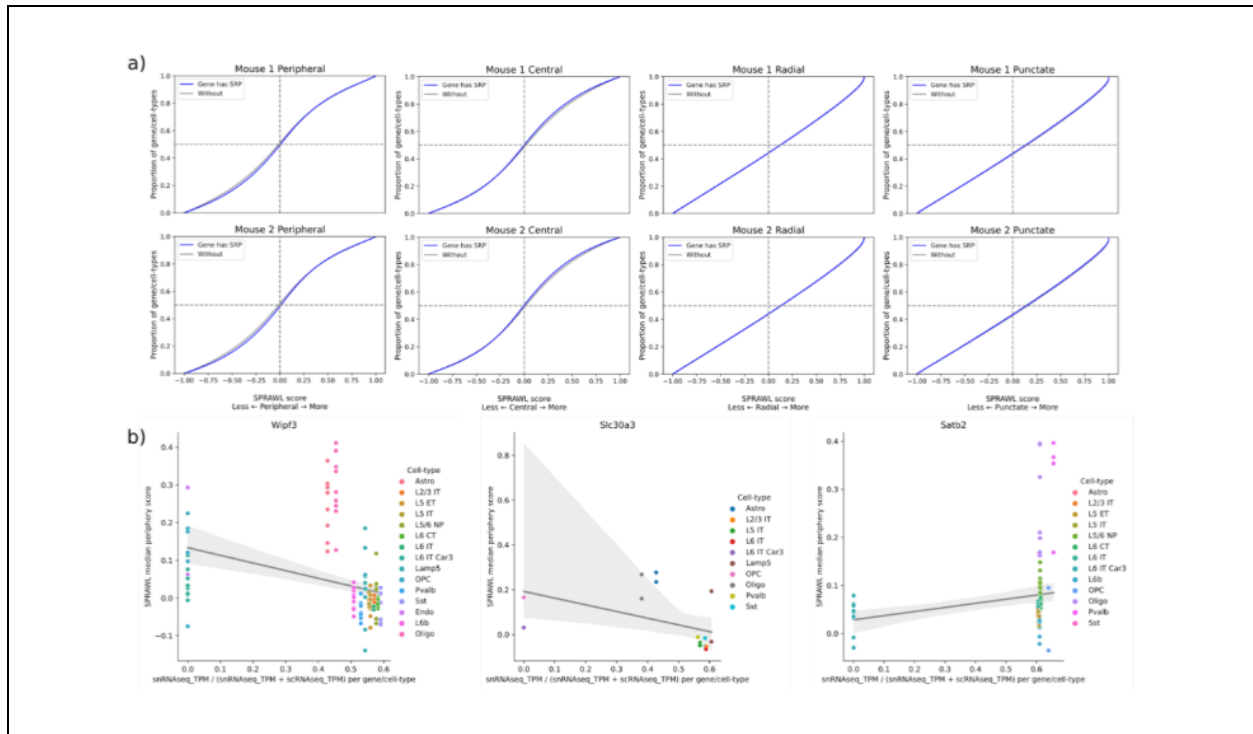

**Supplemental figure 5: SPRAWL scores do not correlate with presence of signal recognition peptide, but do correlate with nuclear enrichment: a) Genes encoding signal recognition peptides do not have significantly differential SPRAWL scores while b) genes such as Wipf3 and Slc30a3 have significantly lower peripheral scores in cell-types with higher nuclear expression. Satb2 shows the opposite unexpected correlation.**

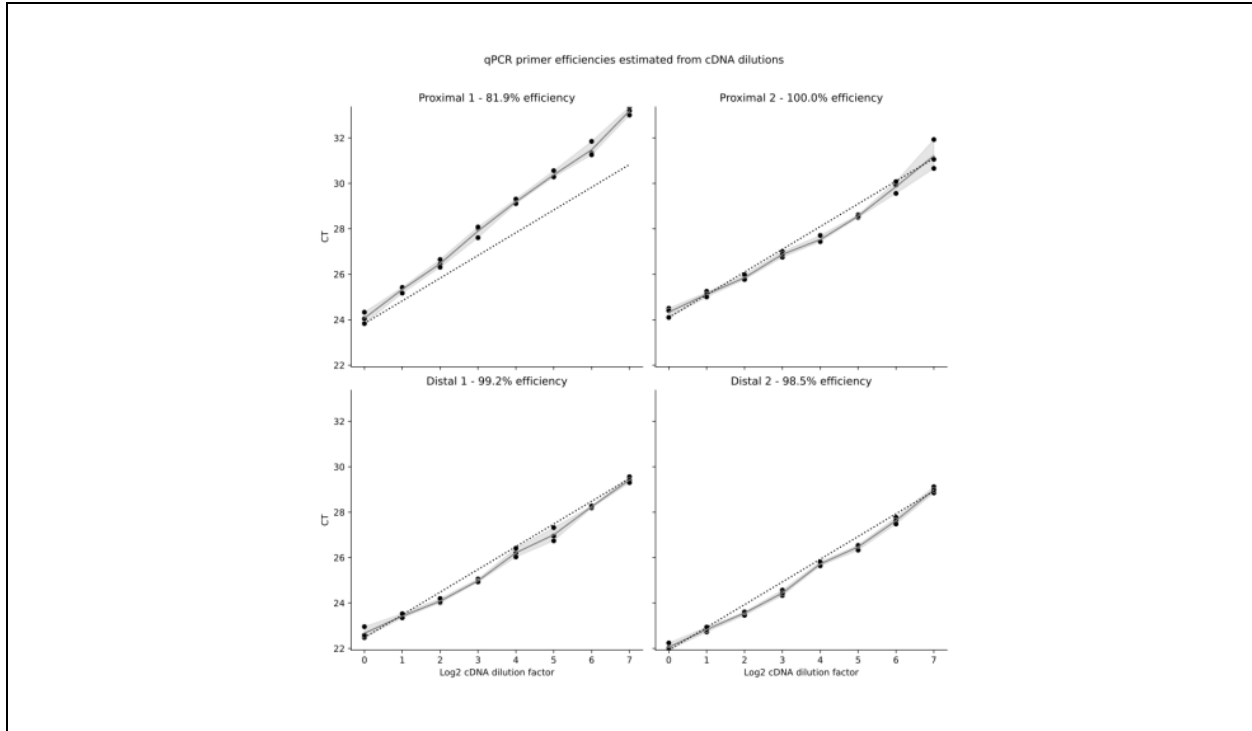

**Supplemental figure 6:** qPCR primer efficiencies for Timp3 3' UTR were estimated by using 2-fold cDNA dilutions of the same 6-hour timepoint sample. Of the two proximal and two distal primer pairs, only proximal primer 1 had low efficiency at 81.9%. The remaining three primers showed nearly perfect 100% efficiency, where a cDNA dilution of 2X resulted in a critical threshold value increase of 1. Dots indicate CT readings of technical replicates done in triplicate with shaded regions between them. Dashed lines indicate 100% efficiency curves.
